# Supplementary material
Source: MDPI journal article supplement (https://www.mdpi.com/2073-4344/11/5/596)
Supplement: s1 [file s1]

# Supporting Information

## CpCo(III) precatalysts for [2+2+2] cycloaddition reactions

Fabian Fischer <sup>1</sup>, Michael Eder <sup>2</sup>, and Marko Hapke\*<sup>1,2</sup>

<sup>a</sup> *Leibniz-Institut für Katalyse (LIKAT), Albert-Einstein-Strasse 29a, D-18059 Rostock (Germany)*

<sup>b</sup> *Johannes Kepler Universität Linz, Institut für Katalyse (INCA), Altenberger Strasse 69, A-4040 (Austria)*

*E-mail: marko.hapke@jku.at*

*Marko Hapke: [orcid.org/0000-0001-7454-9184](https://orcid.org/0000-0001-7454-9184), ResearcherID I-7444-2012*

### Table of contents

|                                        |    |
|----------------------------------------|----|
| 1. General methods and materials ..... | 2  |
| 2. Analytical data of complexes .....  | 3  |
| References .....                       | 28 |

## 1. General methods and materials

All experiments were carried out under inert gas atmosphere (argon) in flame dried Schlenk tubes or glass reaction vials. The anhydrous solvents (tetrahydrofuran, toluene, dichloromethane and *n*-hexane) were dried in a solvent purification system MD-5 from Inert (former Innovative Technology). All NMR spectra were recorded on a Bruker AV 300, AV 400, AV 500 or Fourier 300 NMR spectrometer. Elemental analysis was performed at a Perkin Elmer AAS-Analyst 300 (Co), Leco Microanalysator-TruSpec CHNS (C, H), Radiometer Analytical SAS (Titrator) Titrab 870-TIM 870 (Br) and a Perkin Elmer UV/VIS-spectrometer Lambda 2 (P).

The phosphites  $\text{P}(\text{O}i\text{Pr})_3$ ,  $\text{P}[\text{OCH}_2(\text{CF}_3)_2]_3$  and tris[2,4-bis(*tert*-butyl)phenyl]phosphite are commercially available and have been dried by addition of spherical molecular sieve A4. They were only distilled in vacuum, if the purity was <98%. Tricyclohexylphosphite has been synthesized according to a recently reported literature reference.<sup>1</sup>  $\text{CpCo}(\text{CO})_2$ ,  $\text{Co}_2(\text{CO})_8$  and NaCp have been purchased and used as received. The Grignard reagent MeMgBr was commercially purchased.

## 2. Analytical data of complexes

### Complex 2:

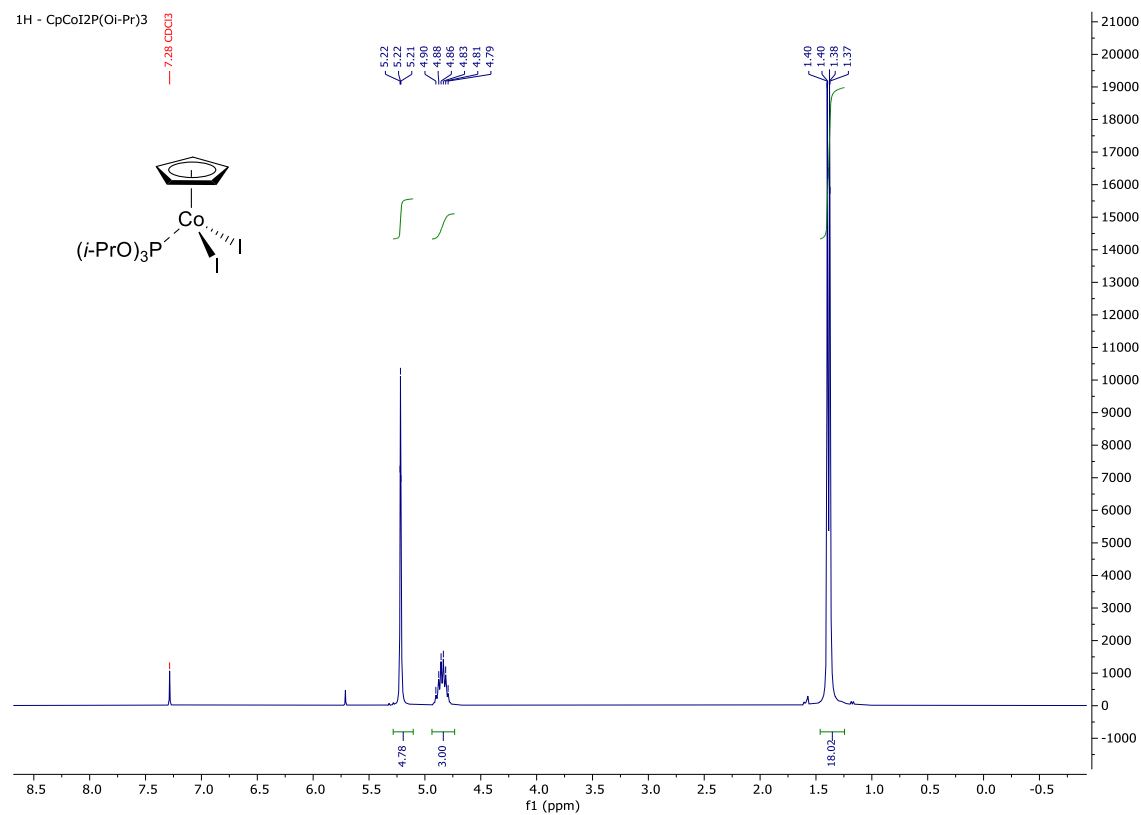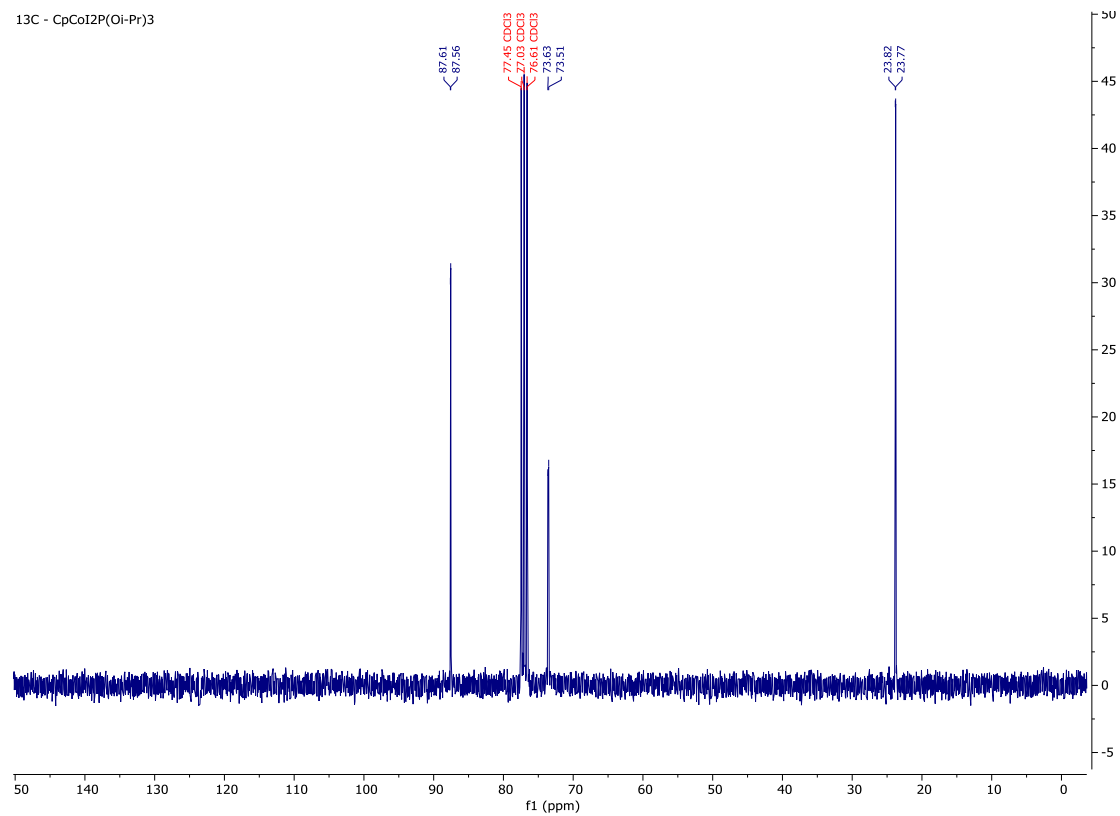

<sup>31</sup>P - CpCoI2P(Oi-Pr)<sub>3</sub>

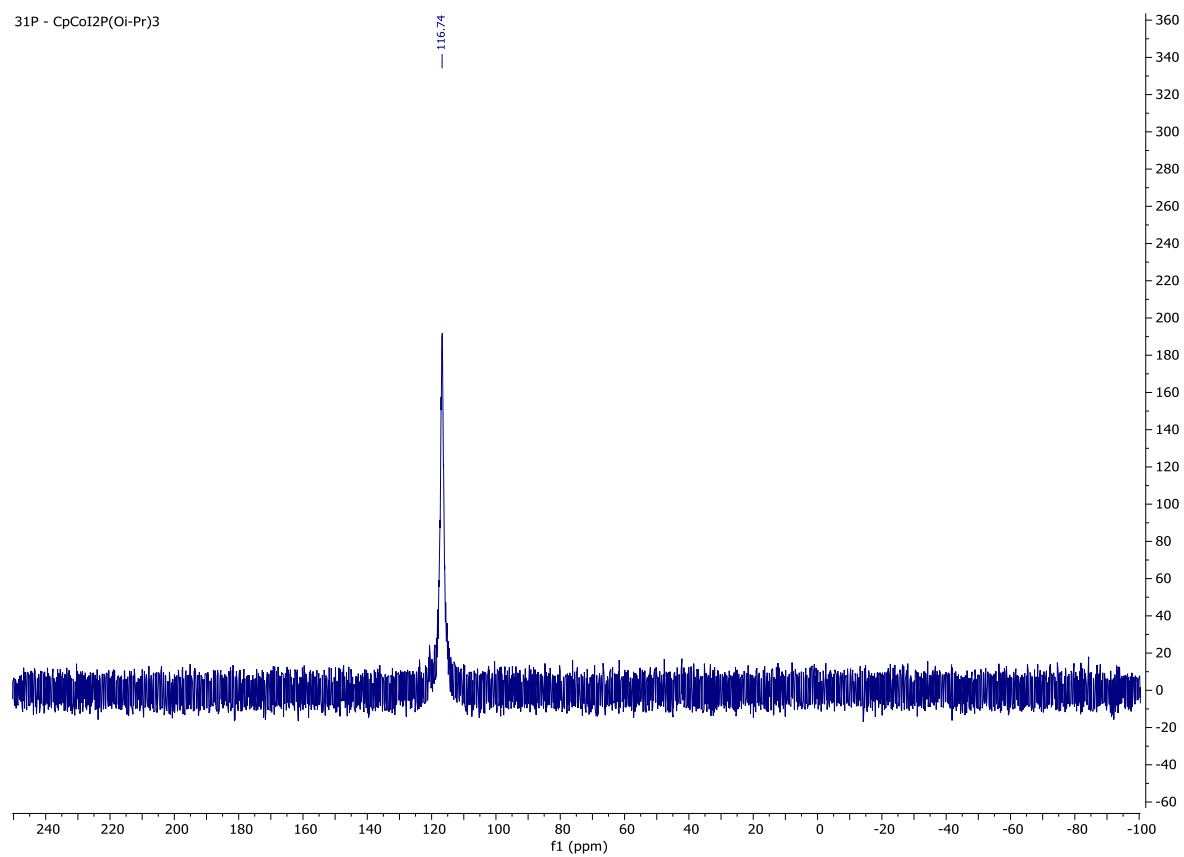

## Complex 3:

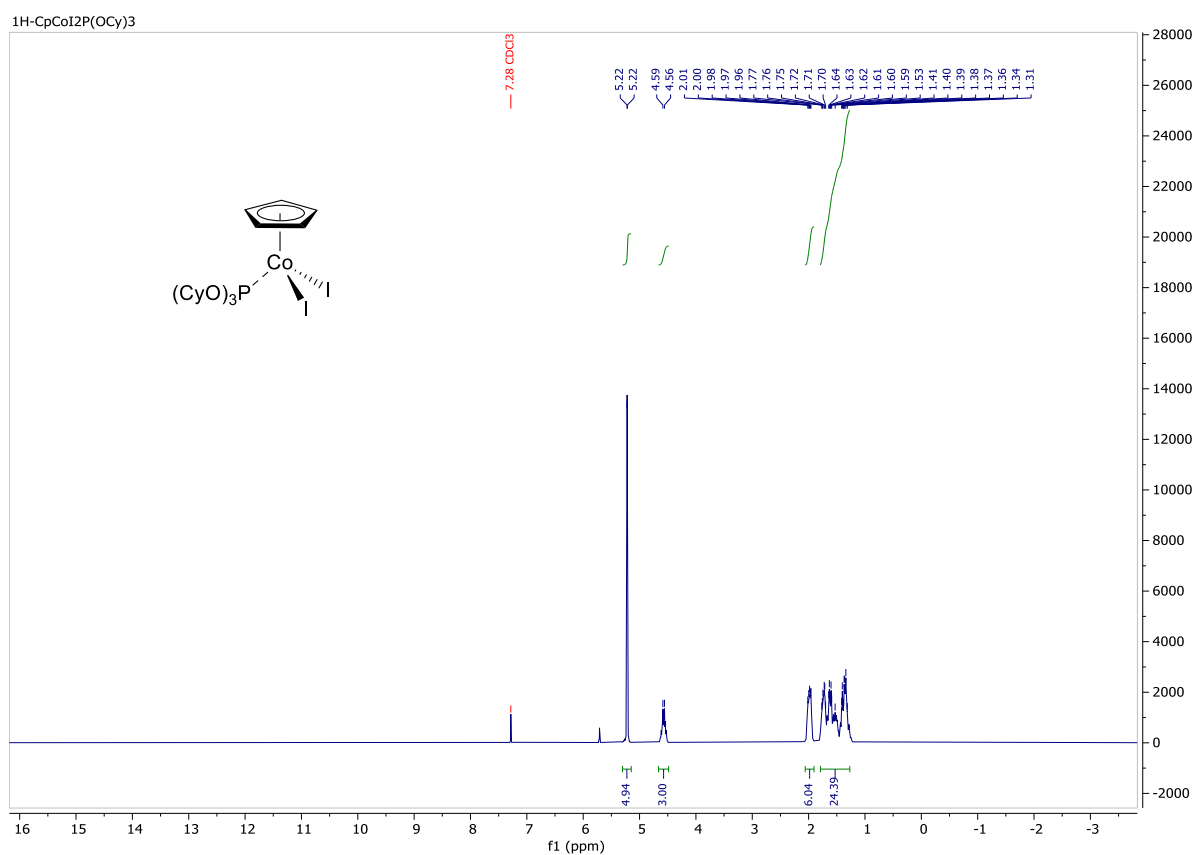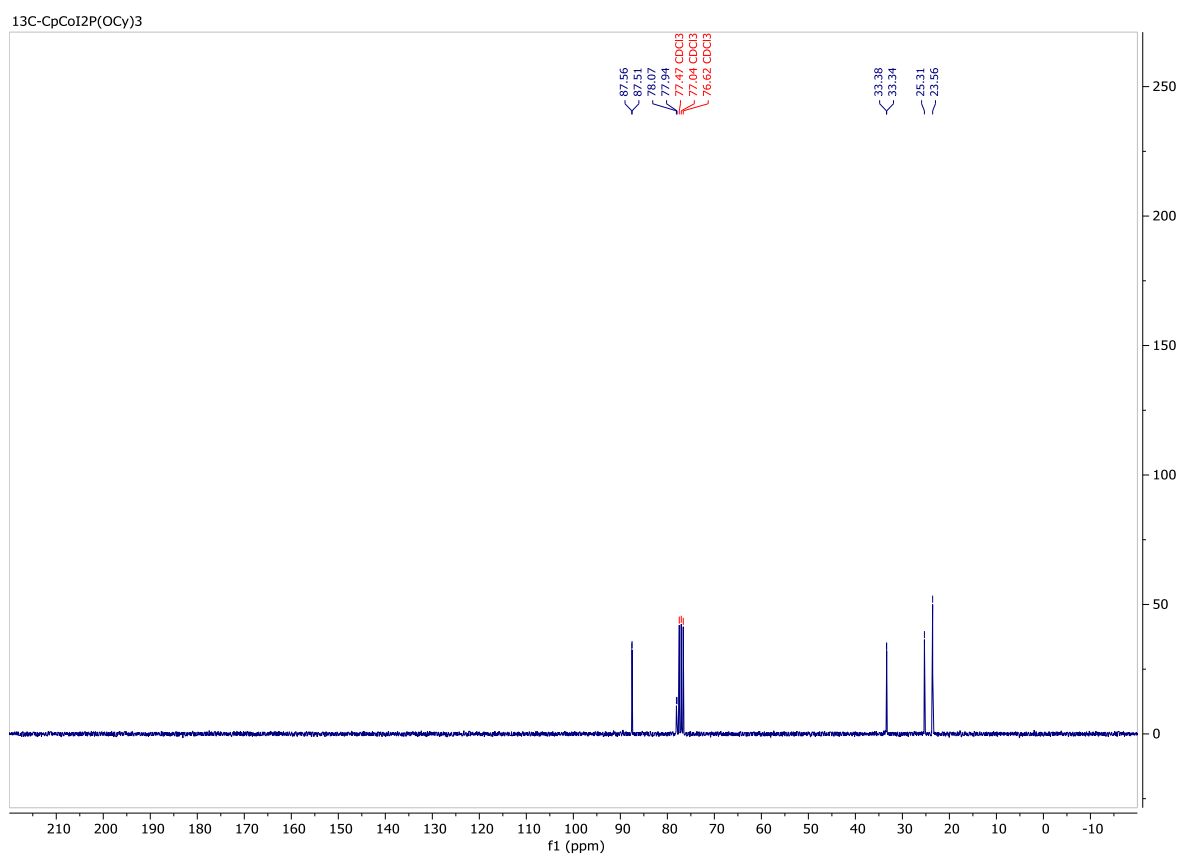

$^{31}\text{P}$ -CpCoI<sub>2</sub>P(OCy)<sub>3</sub>

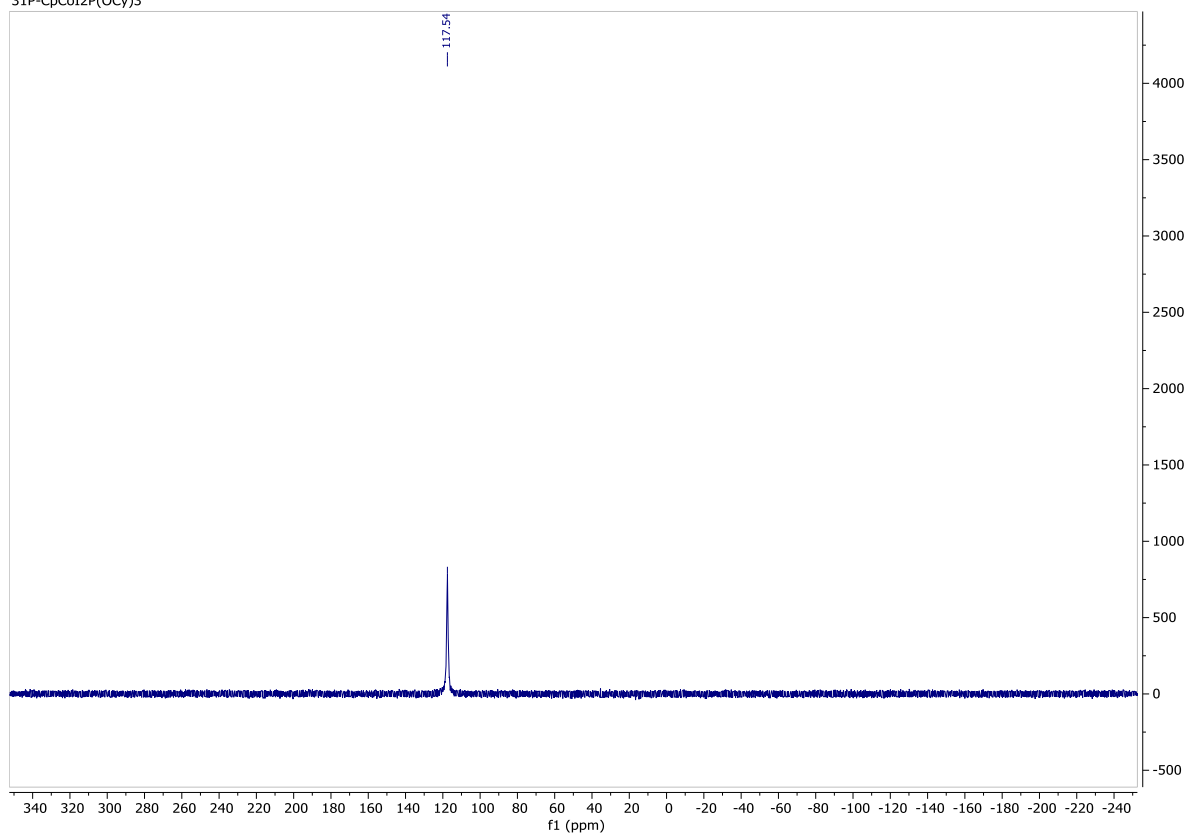

## Complex 4:

CpCoI<sub>2</sub>P(OCH(CF<sub>3</sub>)<sub>2</sub>)<sub>3</sub>

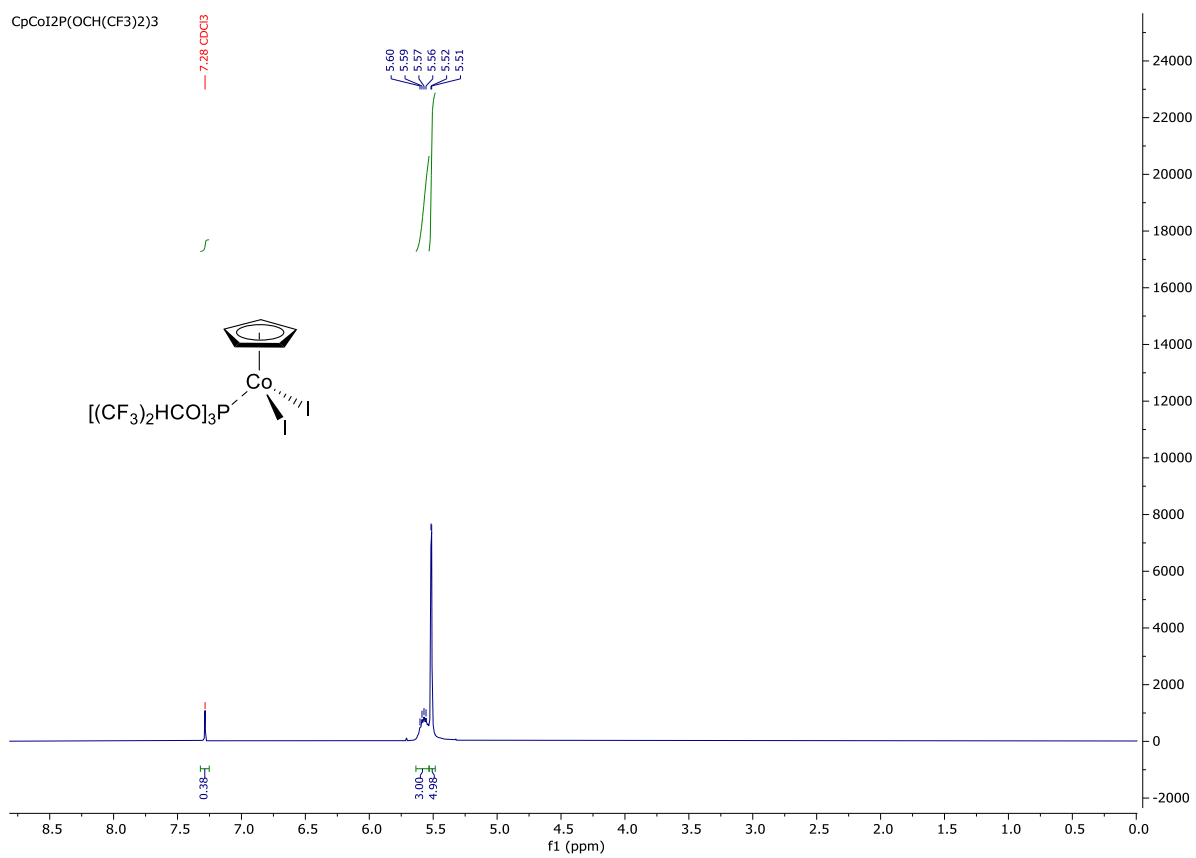

<sup>13</sup>C-CpCoI<sub>2</sub>P(OCH(CF<sub>3</sub>)<sub>2</sub>)<sub>3</sub>

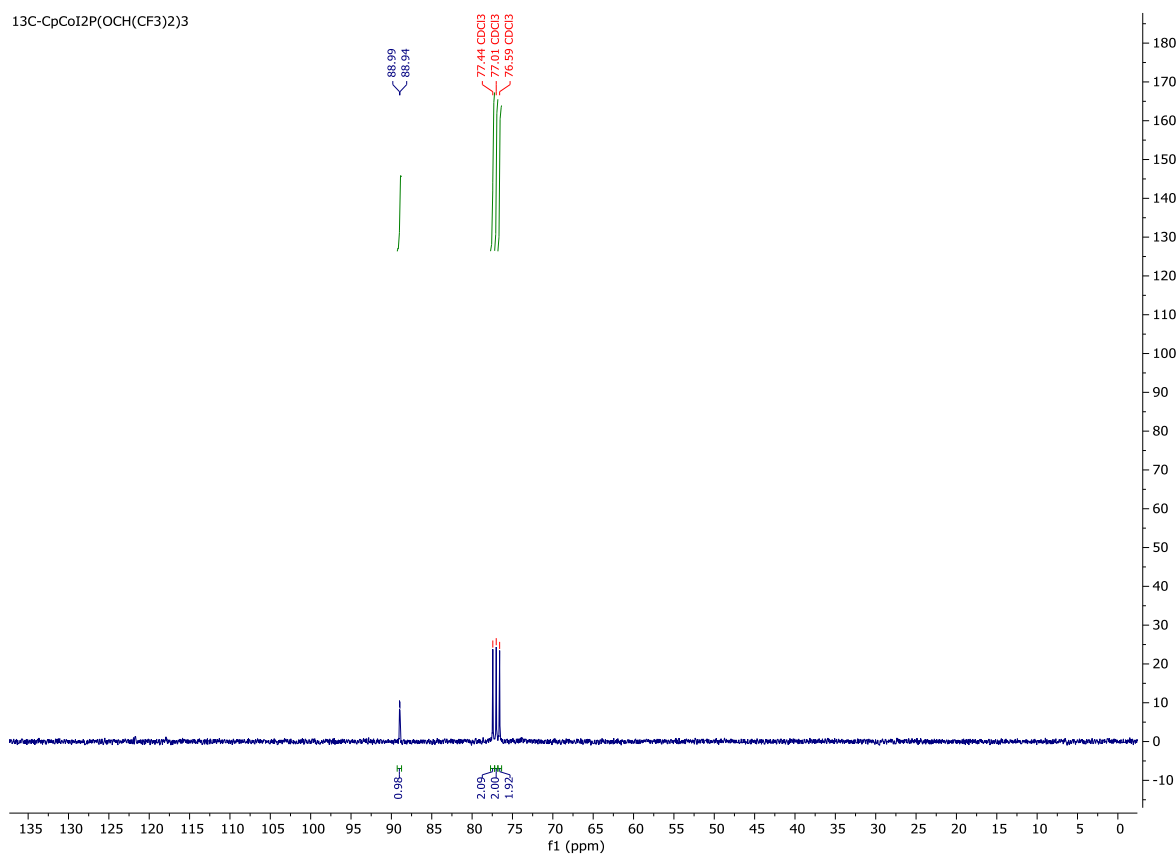

$^{31}\text{P}$ -CpCoI<sub>2</sub>P(OCH(CF<sub>3</sub>)<sub>2</sub>)<sub>3</sub>

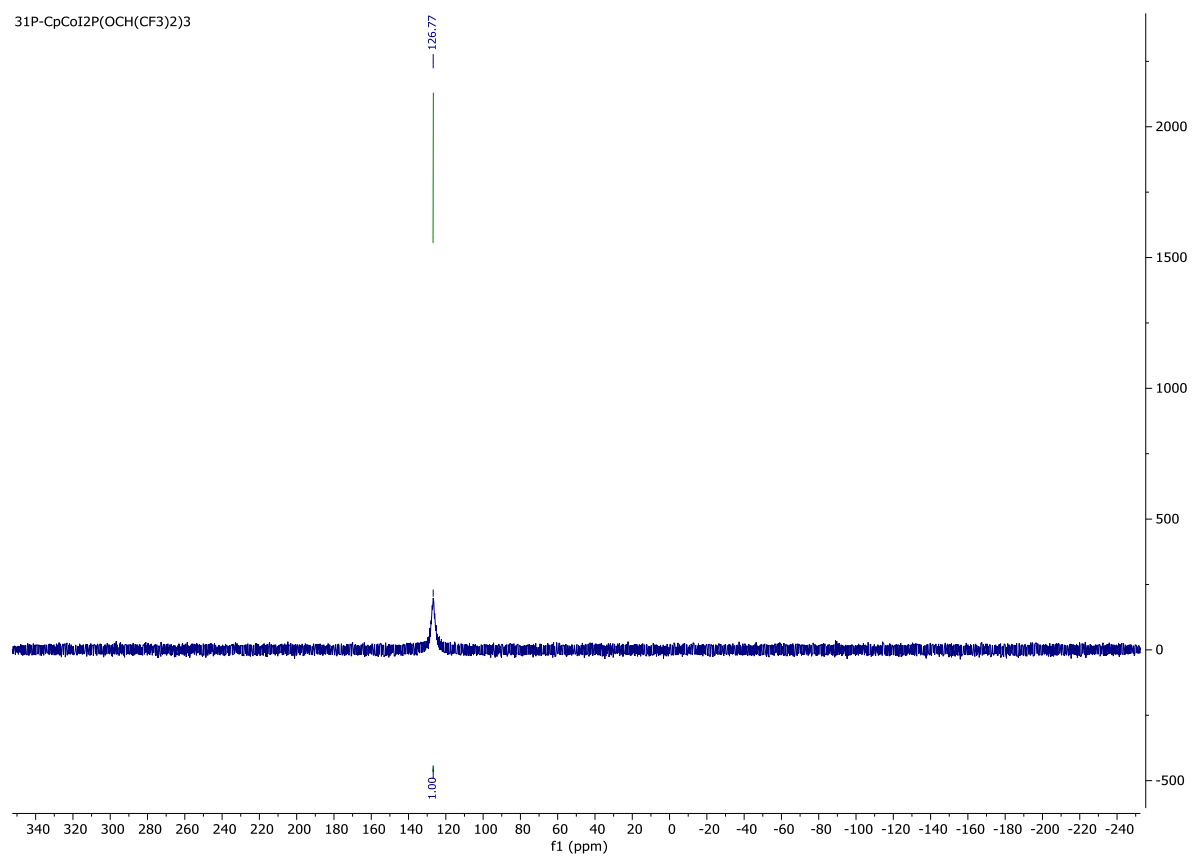



## Complex 6:

$^1\text{H}$ -CpCoI $2[\text{P}(\text{OC}_6\text{F}_5)_3]$

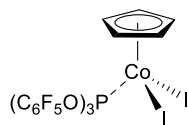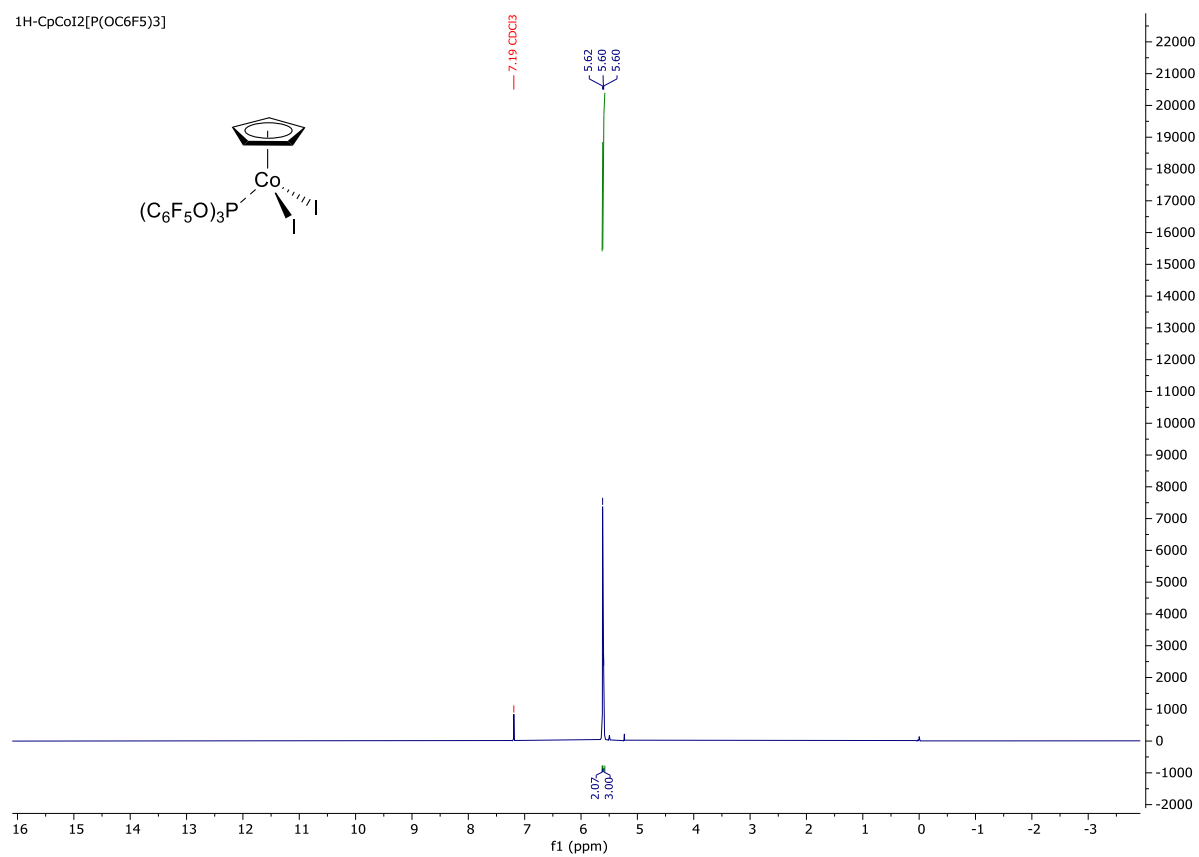

$^{13}\text{C}$ -CpCoI $2[\text{P}(\text{OC}_6\text{F}_5)_3]$

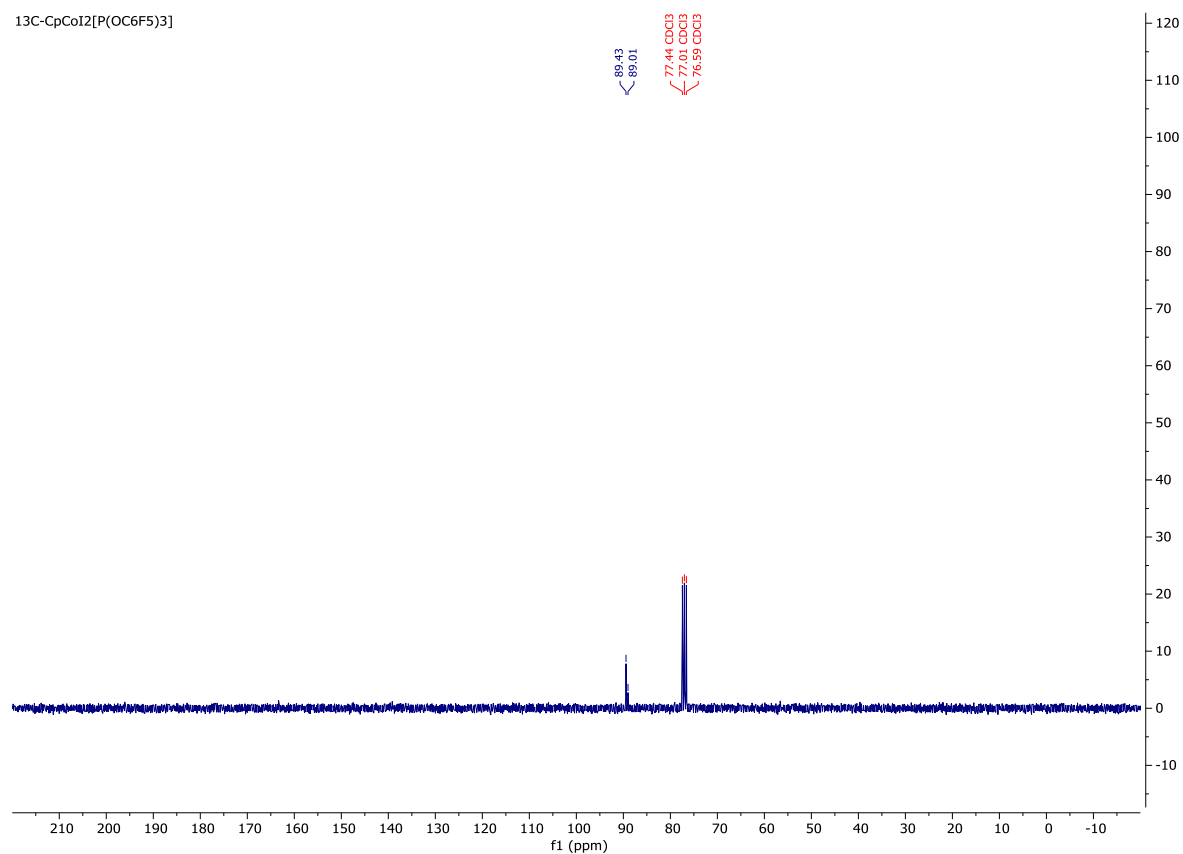

$^{31}\text{P}$ -CpCoI<sub>2</sub>[P(OC<sub>6</sub>F<sub>5</sub>)<sub>3</sub>]

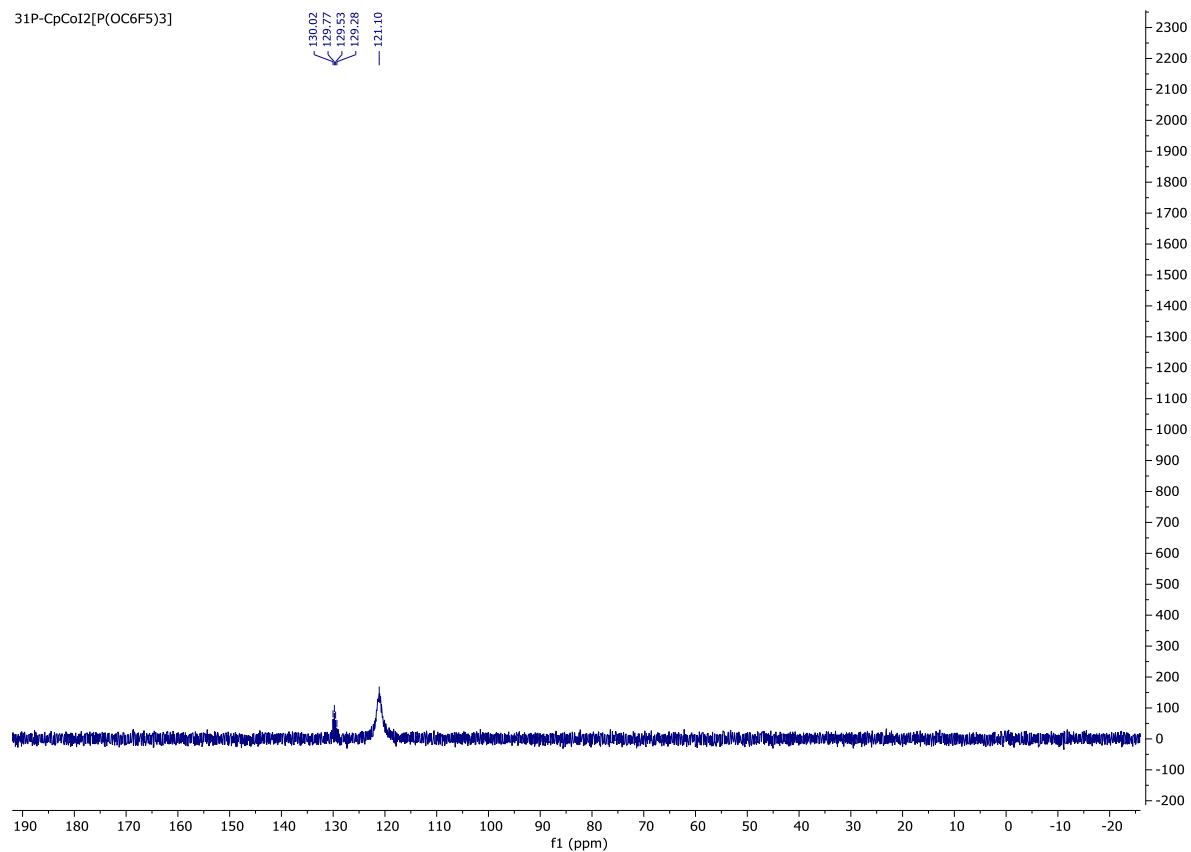

$^{19}\text{F}$ -CpCoI<sub>2</sub>[P(OC<sub>6</sub>F<sub>5</sub>)<sub>3</sub>]

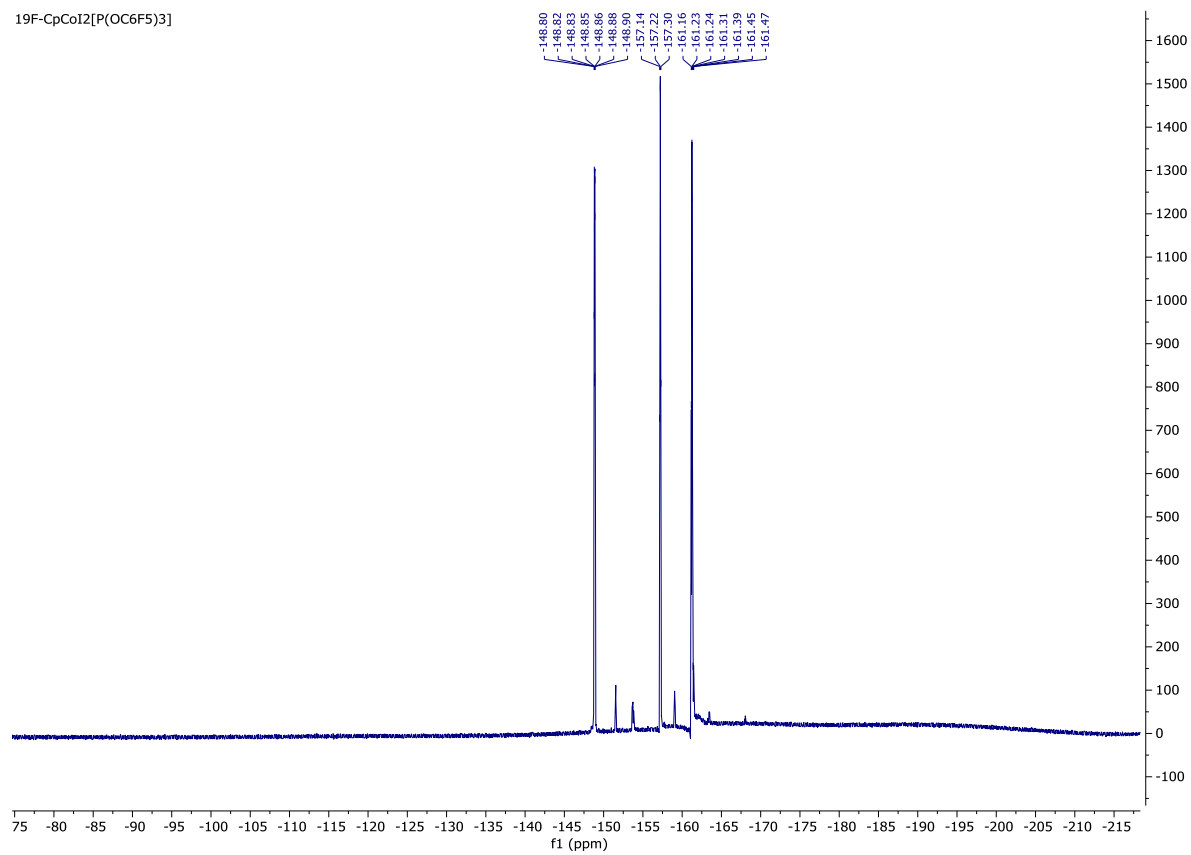

## Complex 7:

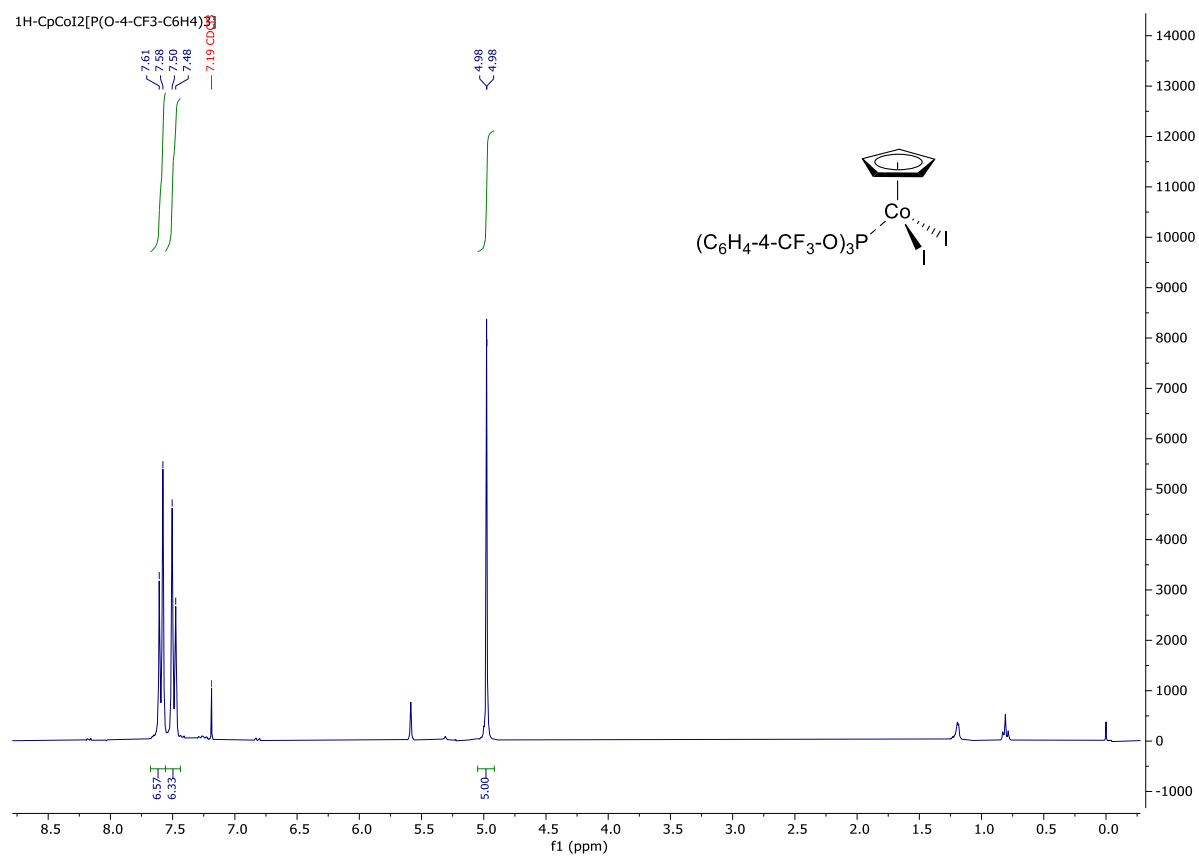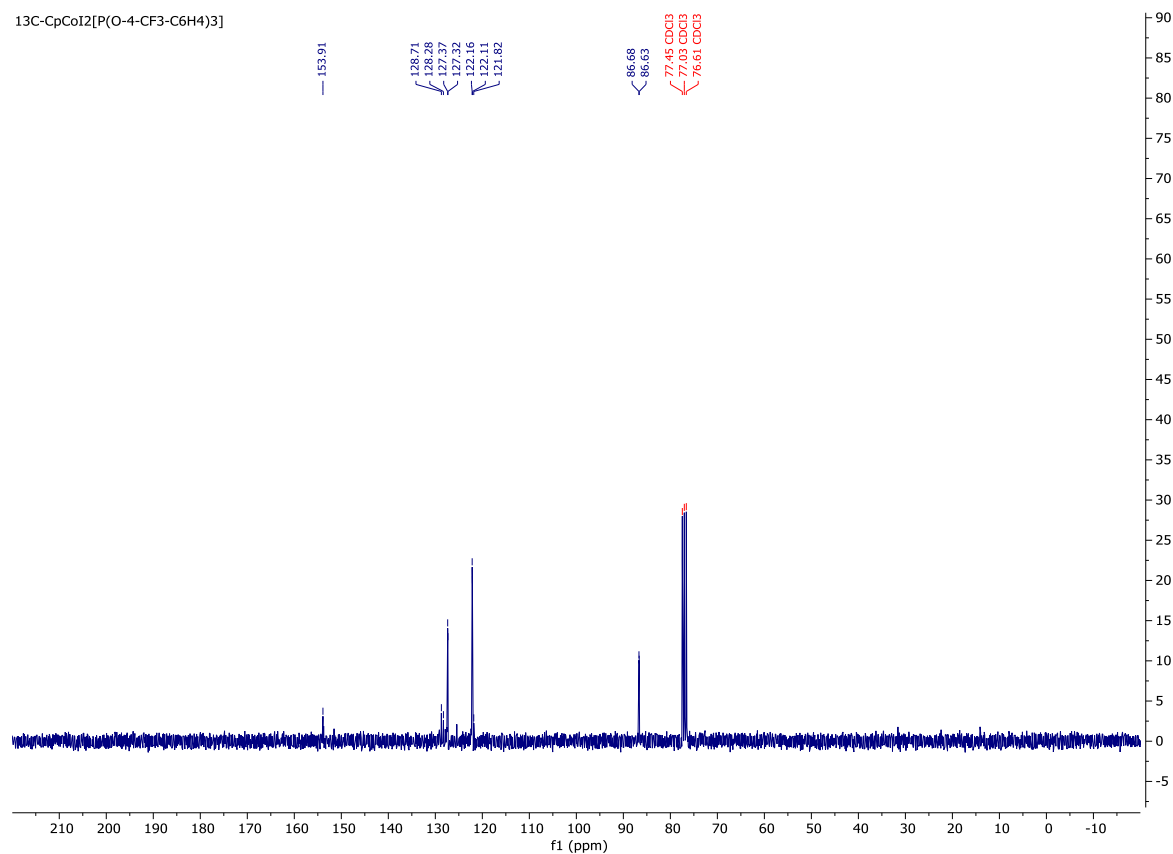

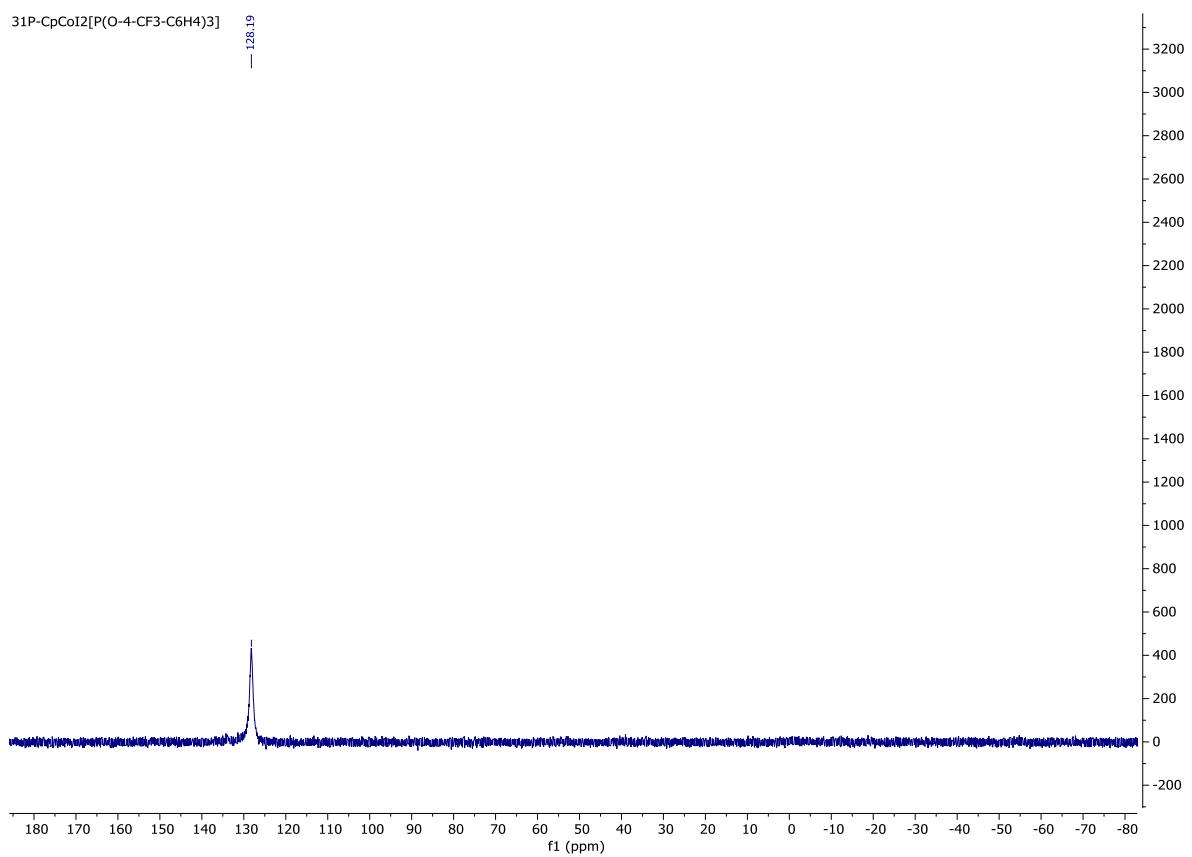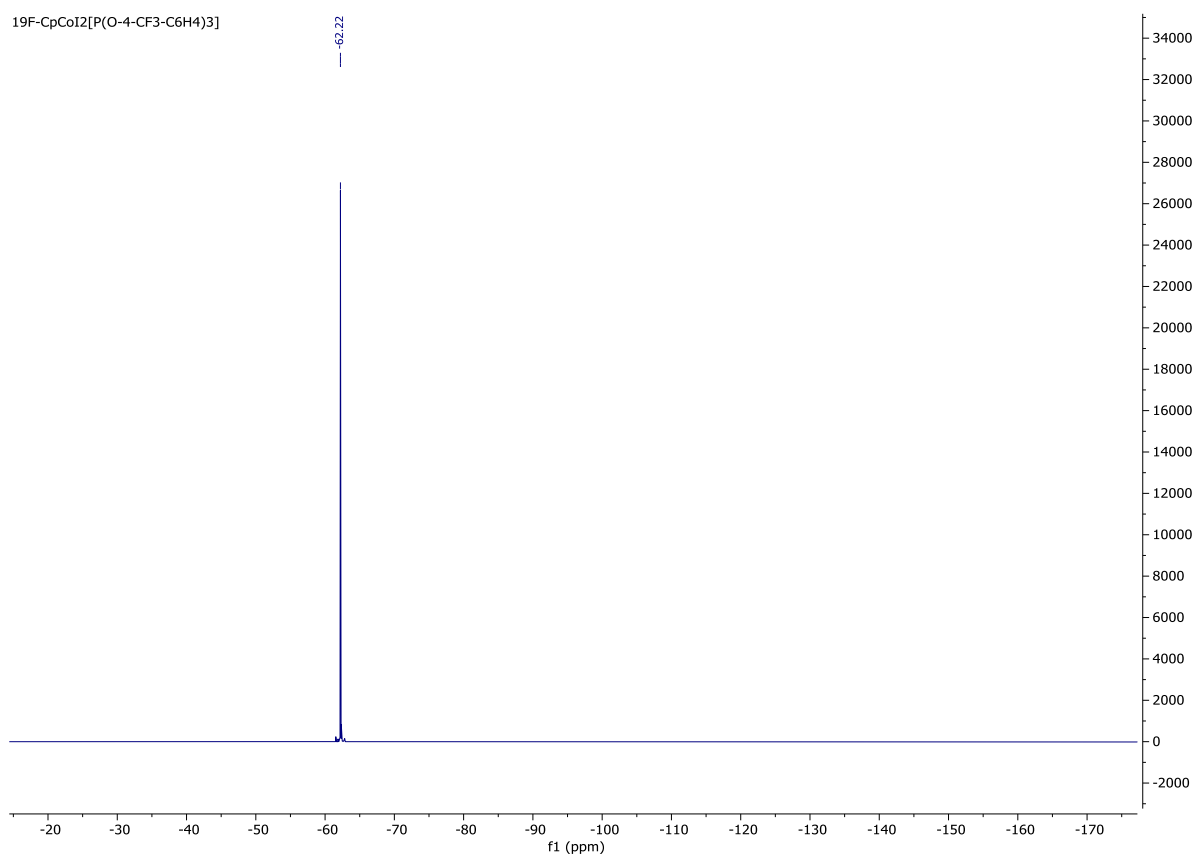

# Complex 8:

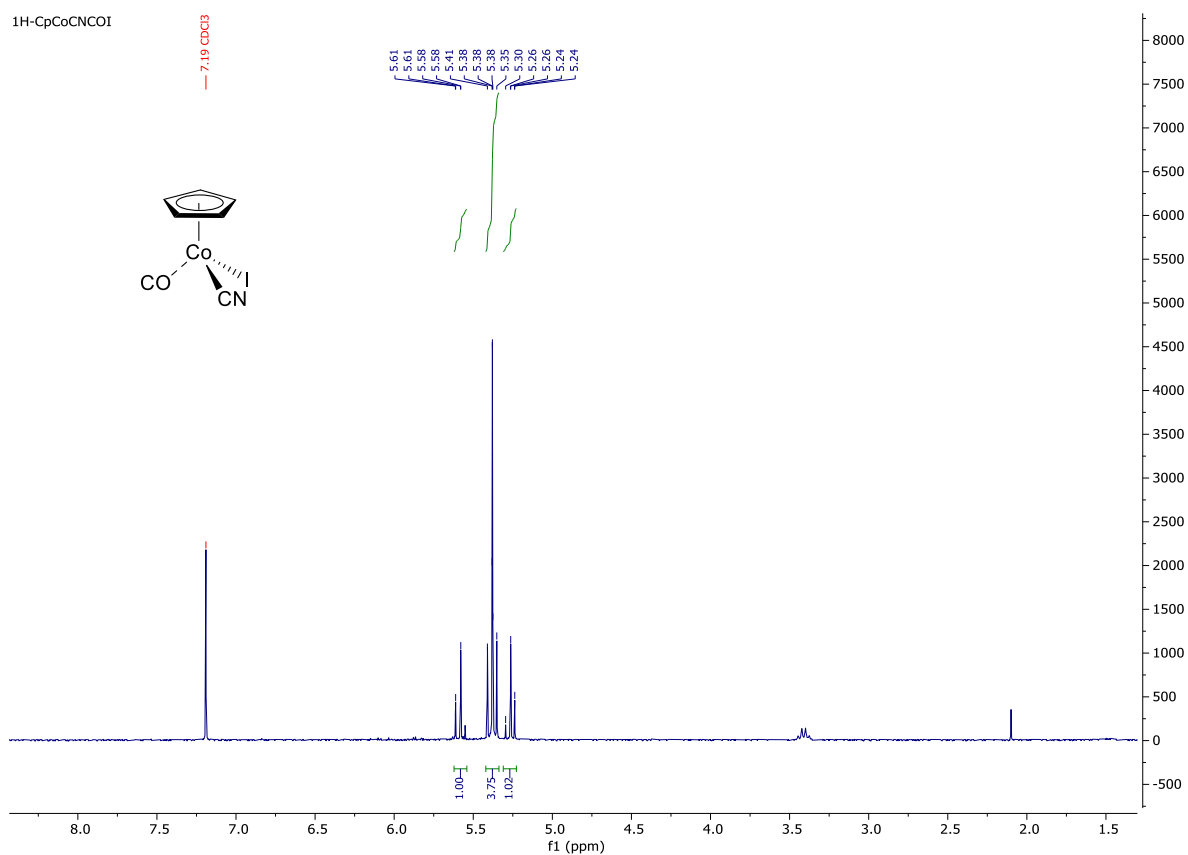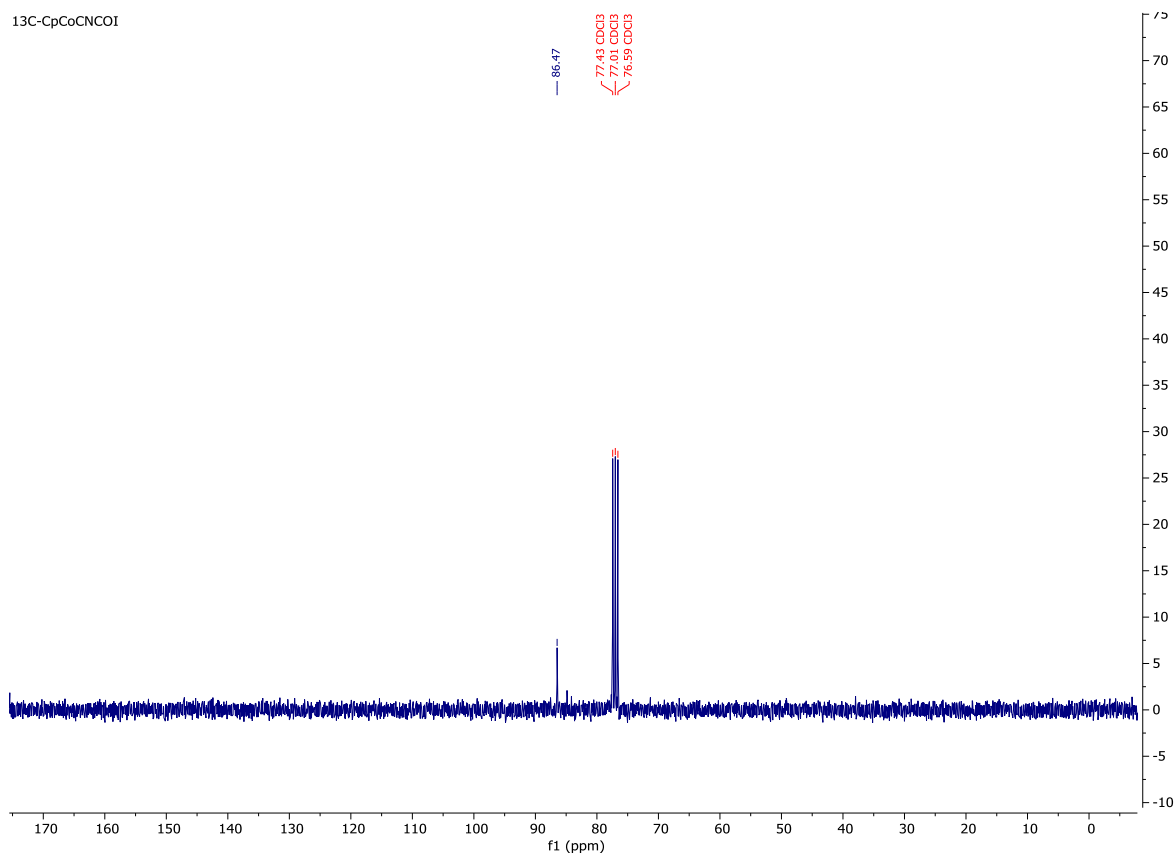

## Complex 9:

$^1\text{H}$ -CpCoICNP(Oi-Pr) $_3$

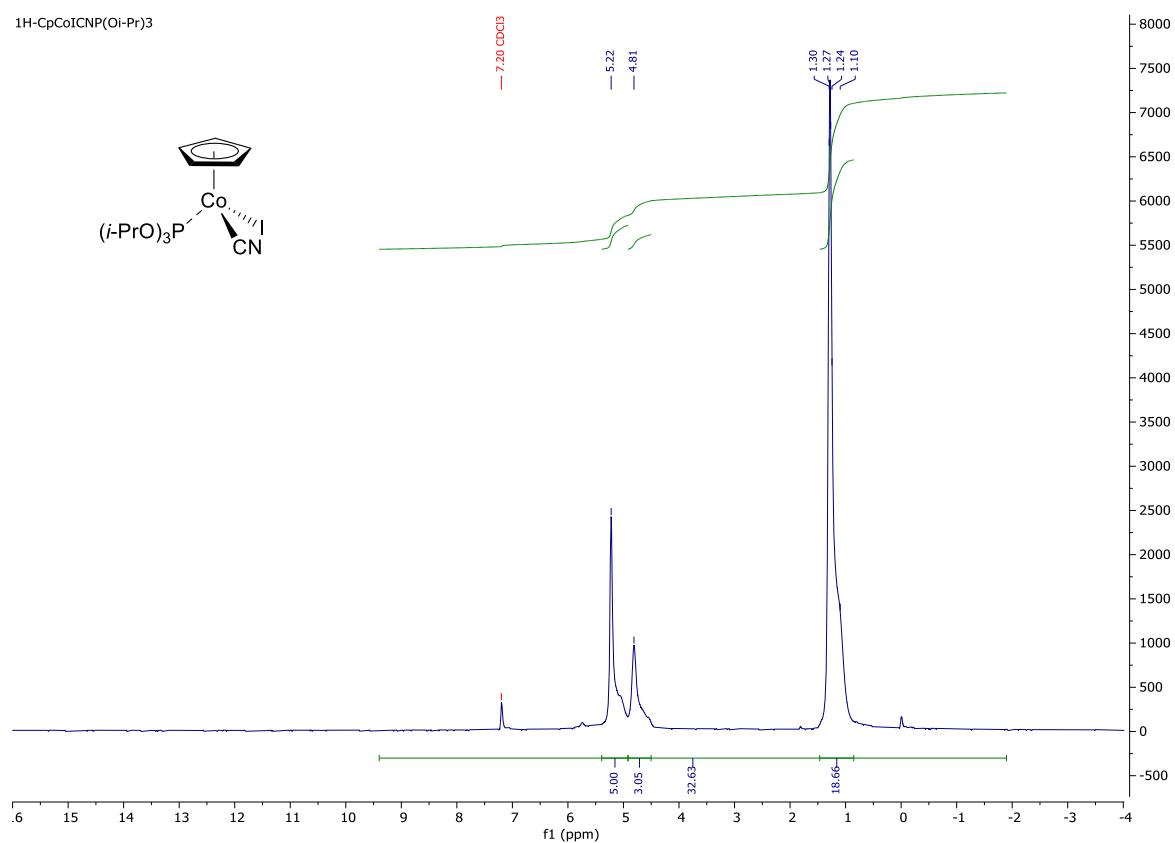

$^{13}\text{C}$ -CpCoICNP(Oi-Pr) $_3$

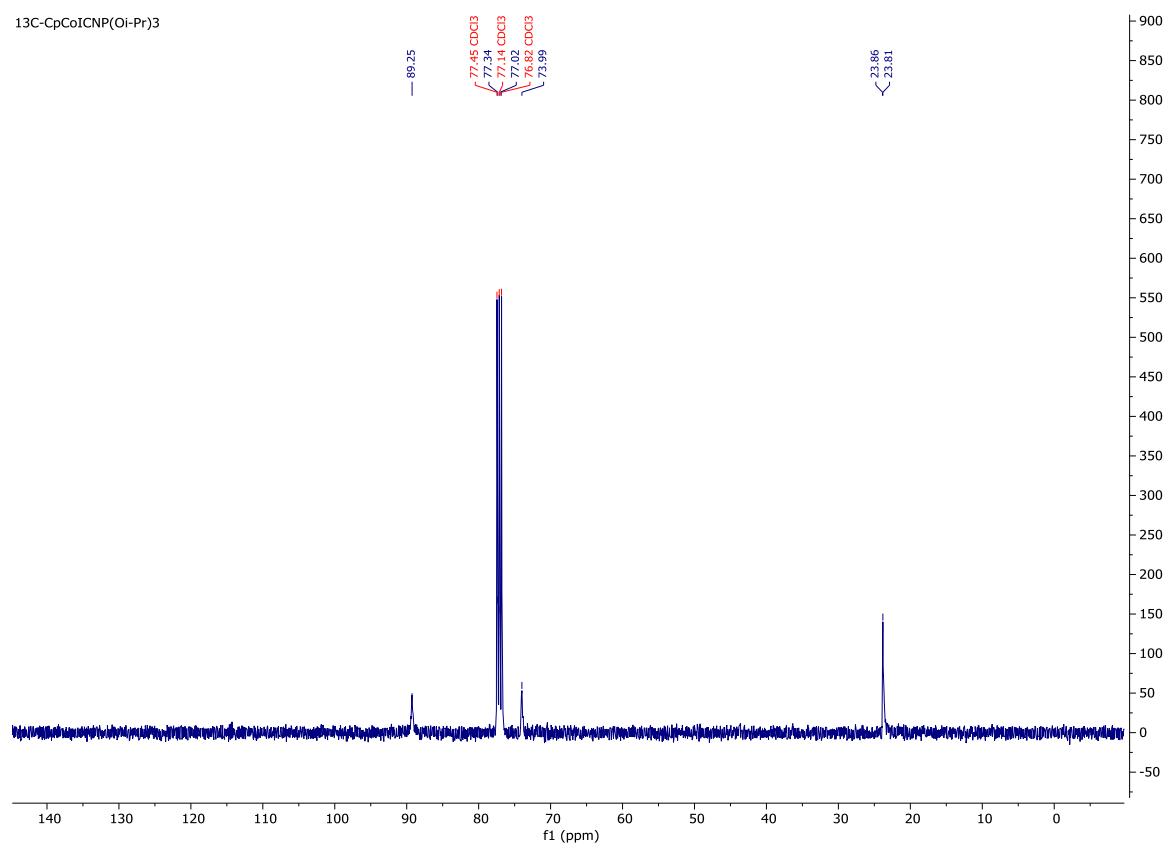

$^{31}\text{P}$ -CpCoICNP(Oi-Pr)<sub>3</sub>

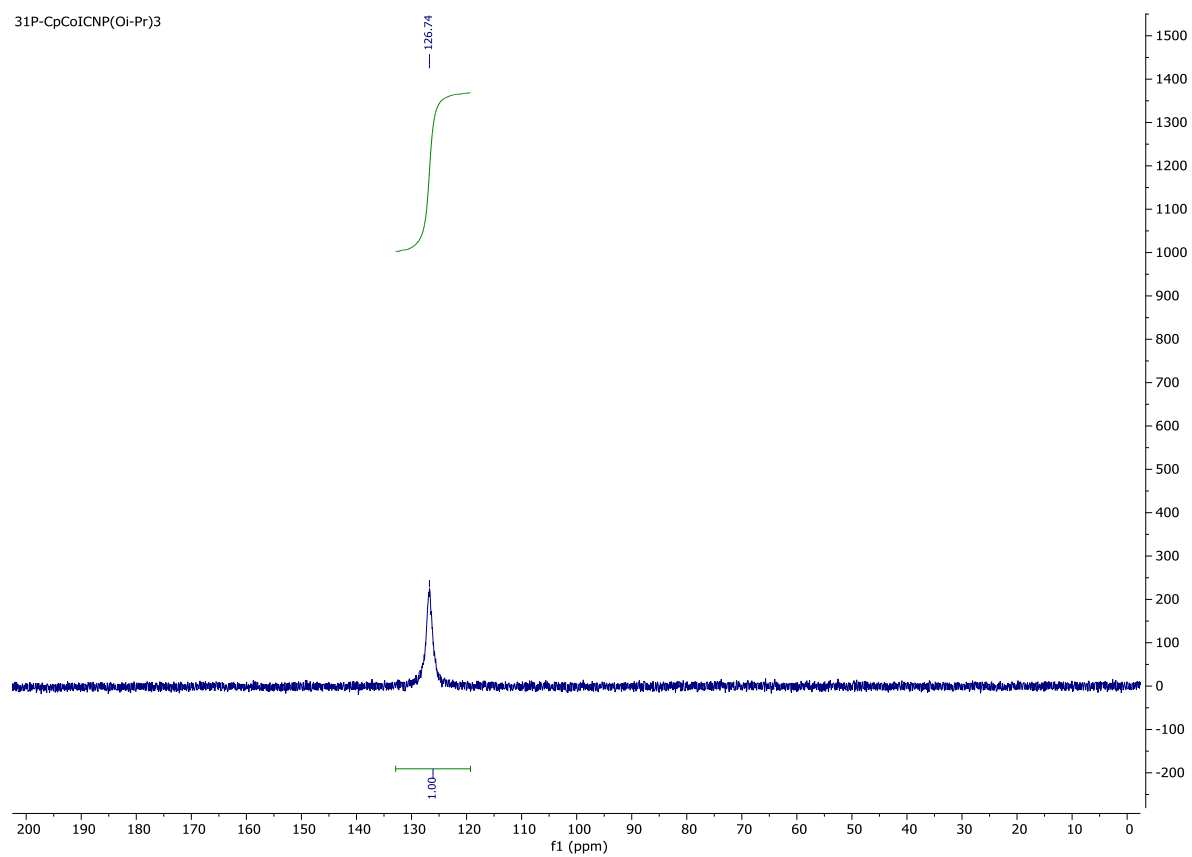

## Complex 9-Me (methylation reaction of 9): Reaction control

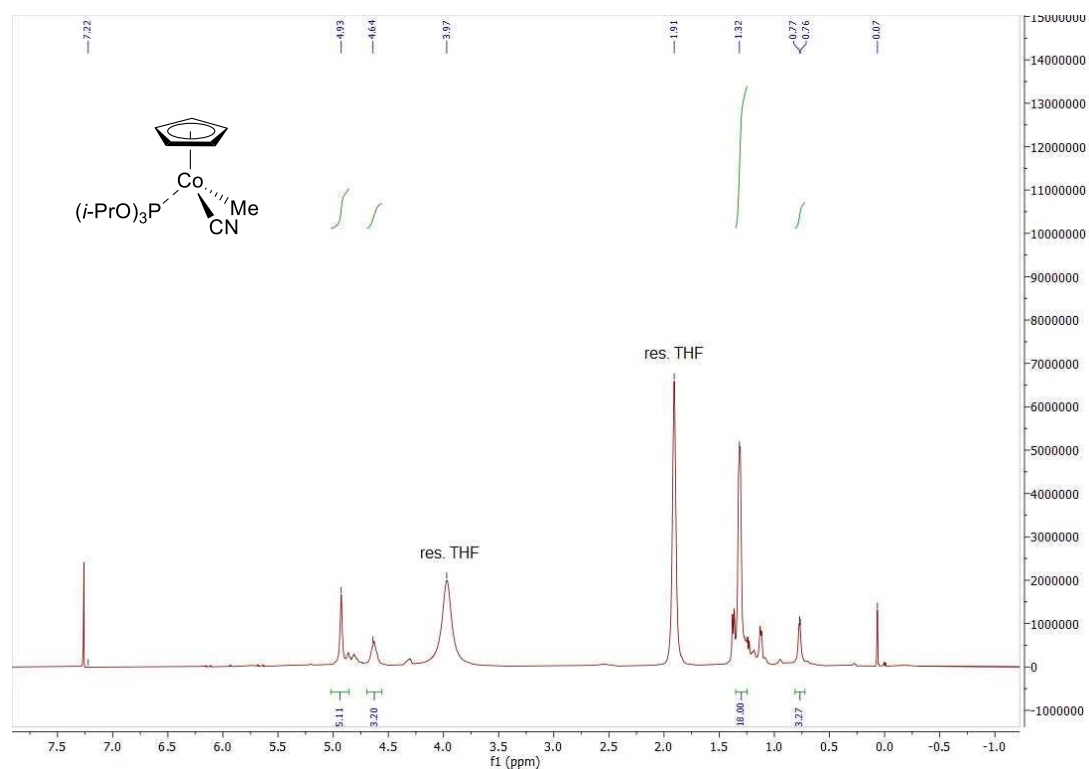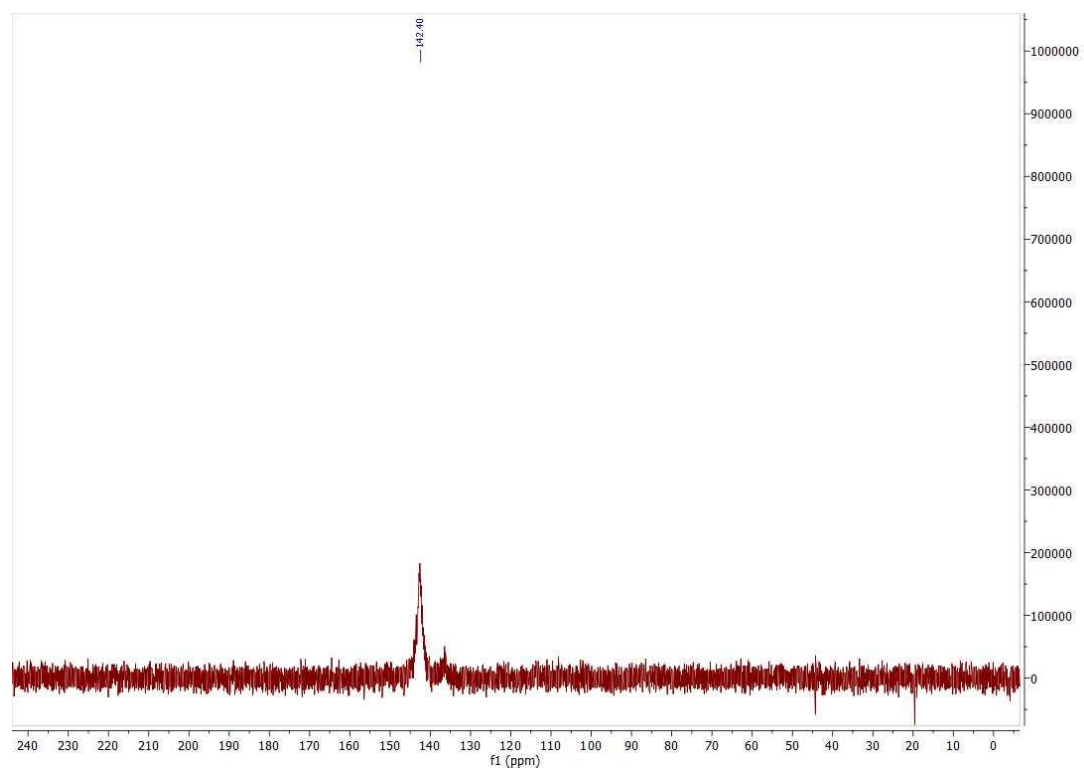



## Complex 10:

$^1\text{H}$ -CpCoICNP(Oi-Pr) $_3$

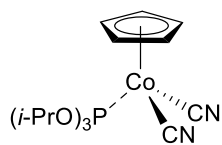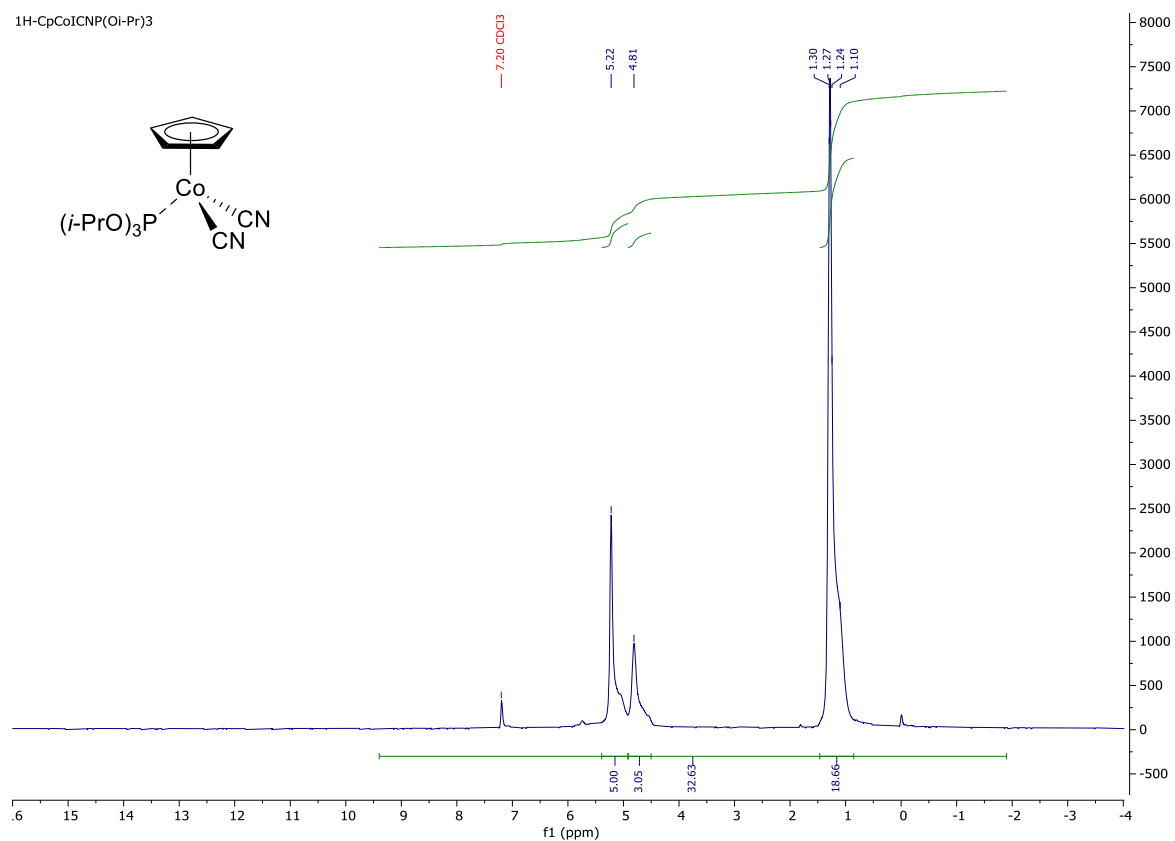

$^{13}\text{C}$ -CpCoICNP(Oi-Pr) $_3$

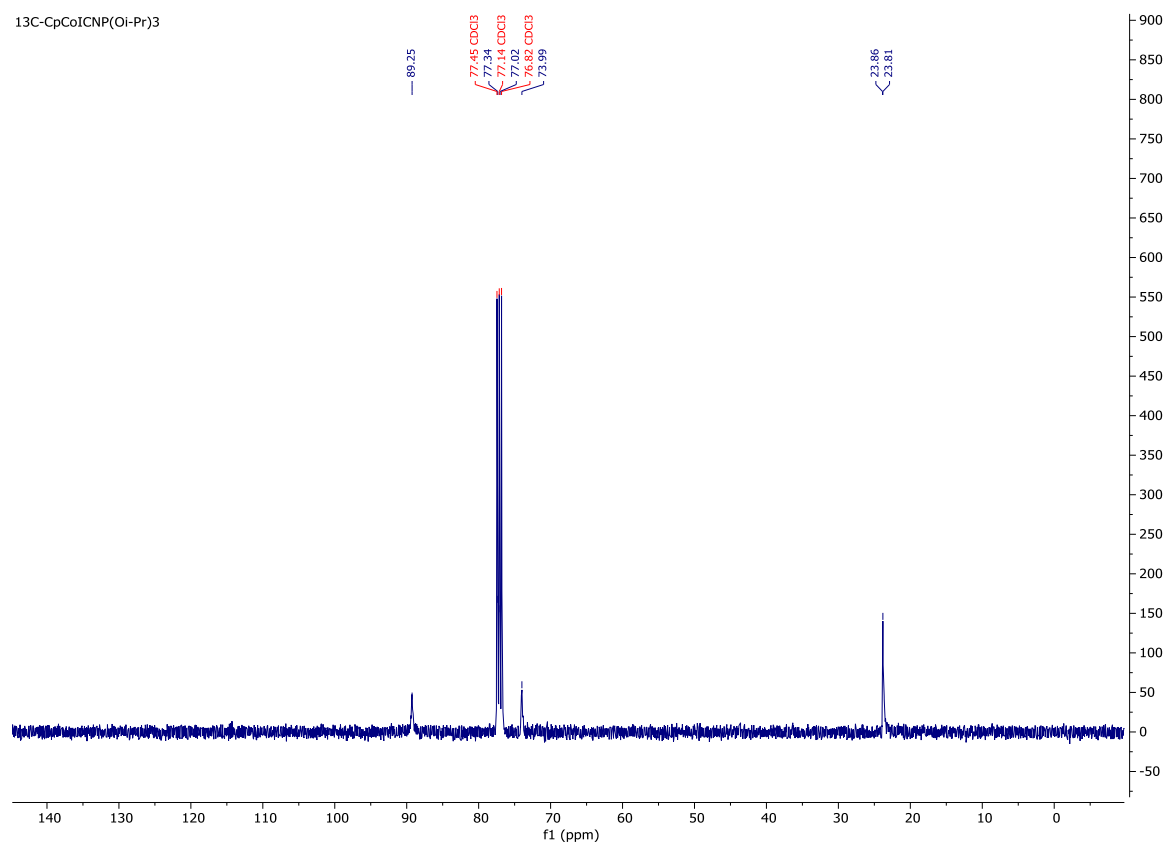

$^{31}\text{P}$ -CpCoICNP(Oi-Pr)<sub>3</sub>



## Complex 14:

$^1\text{H-C}_5\text{H}_4\text{C}(\text{O})\text{OCH}_3\text{CoI}_2(\text{CO})$

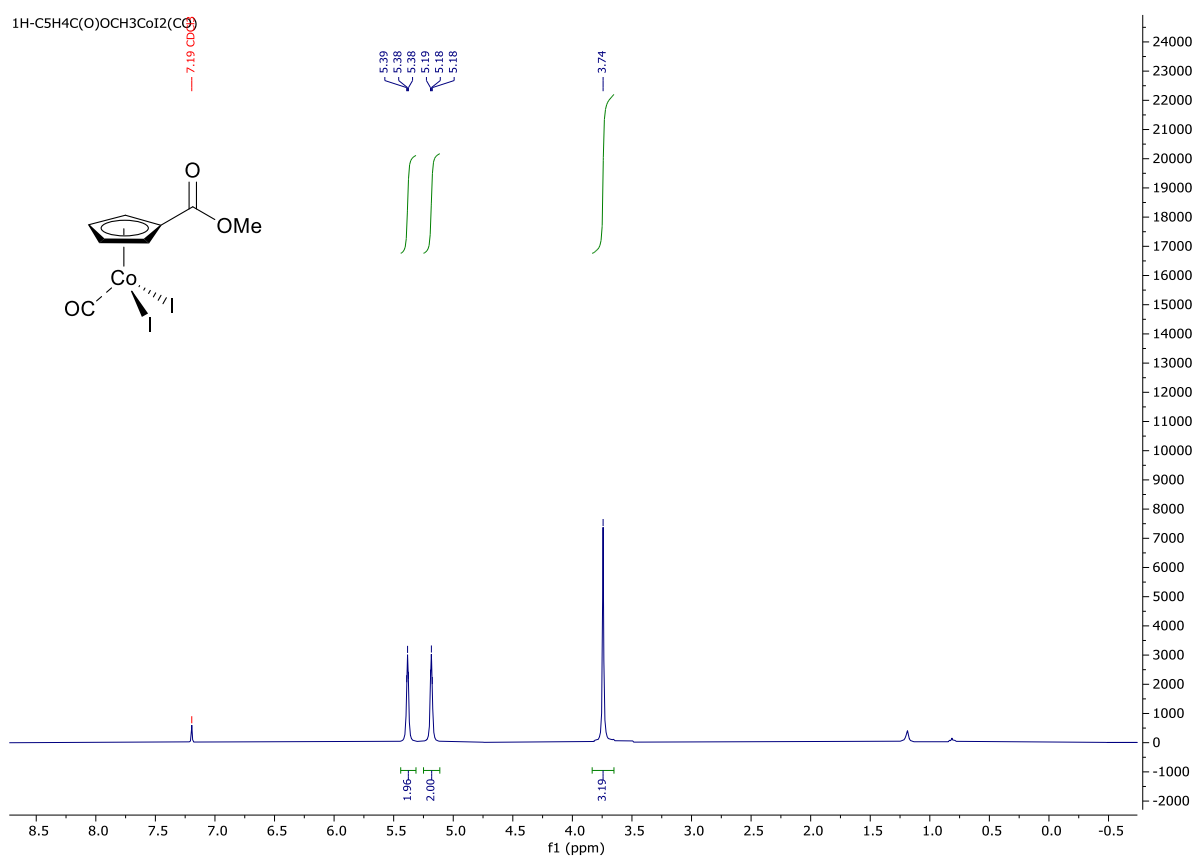

$^{13}\text{C-C}_5\text{H}_4\text{C}(\text{O})\text{OCH}_3\text{CoI}_2(\text{CO})$

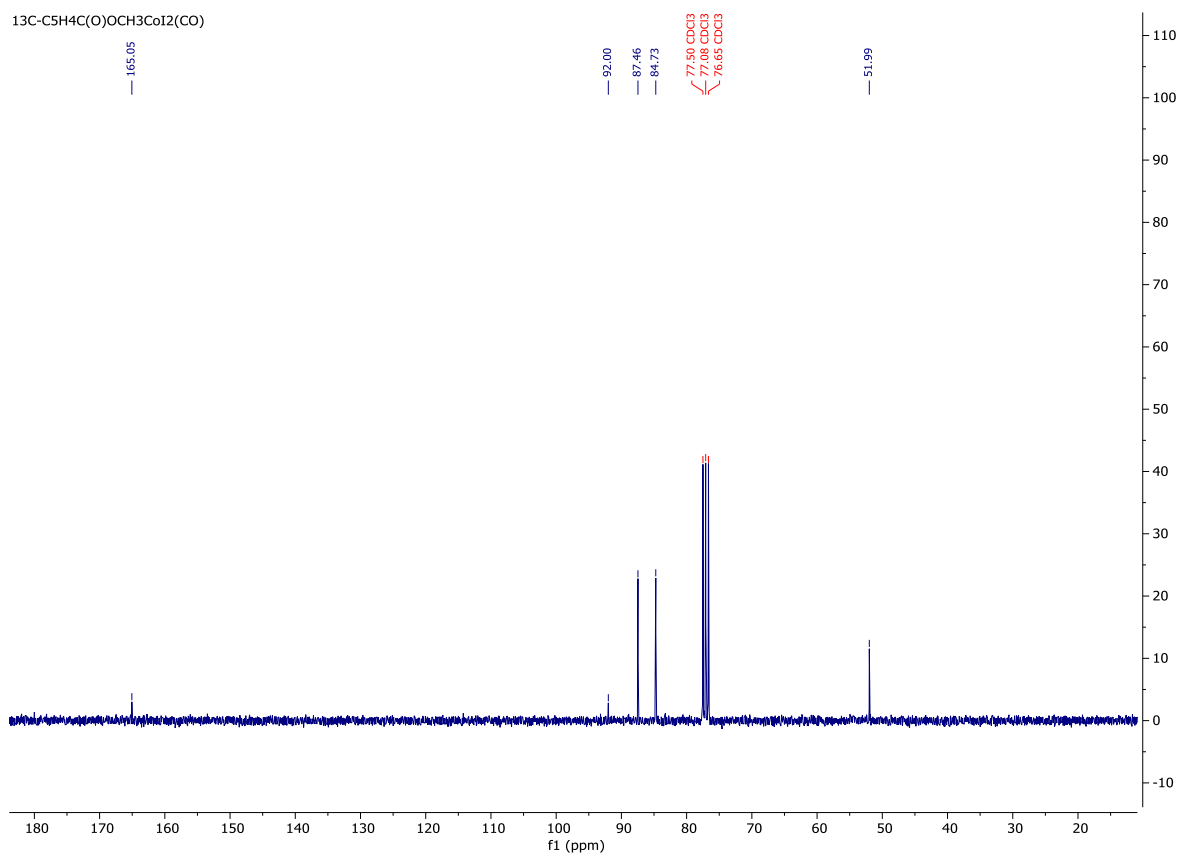

## Complex 15:

$^1\text{H-C}_5\text{H}_4\text{C}(\text{O})\text{OCH}_3\text{CoI}_2(\text{P}(\text{O}i\text{-Pr})_3)$

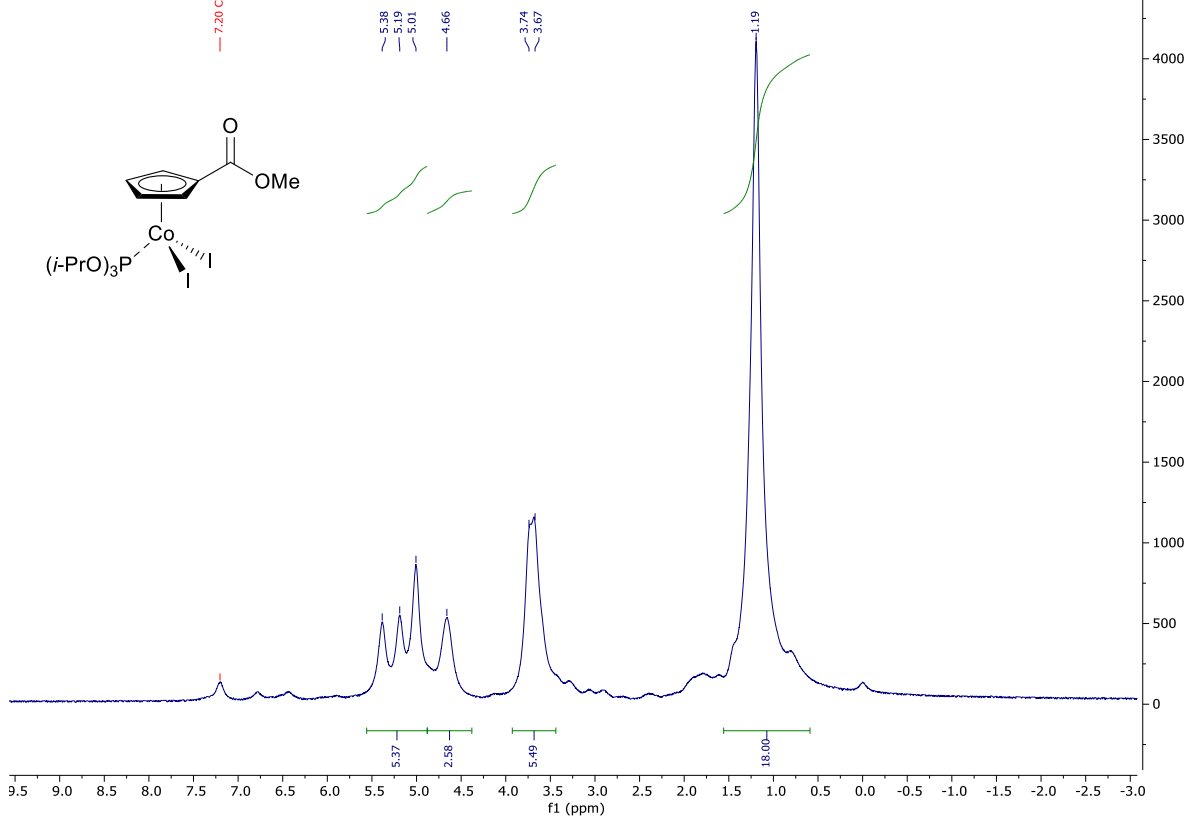

$^{13}\text{C-C}_5\text{H}_4\text{C}(\text{O})\text{OCH}_3\text{CoI}_2(\text{P}(\text{O}i\text{-Pr})_3)$

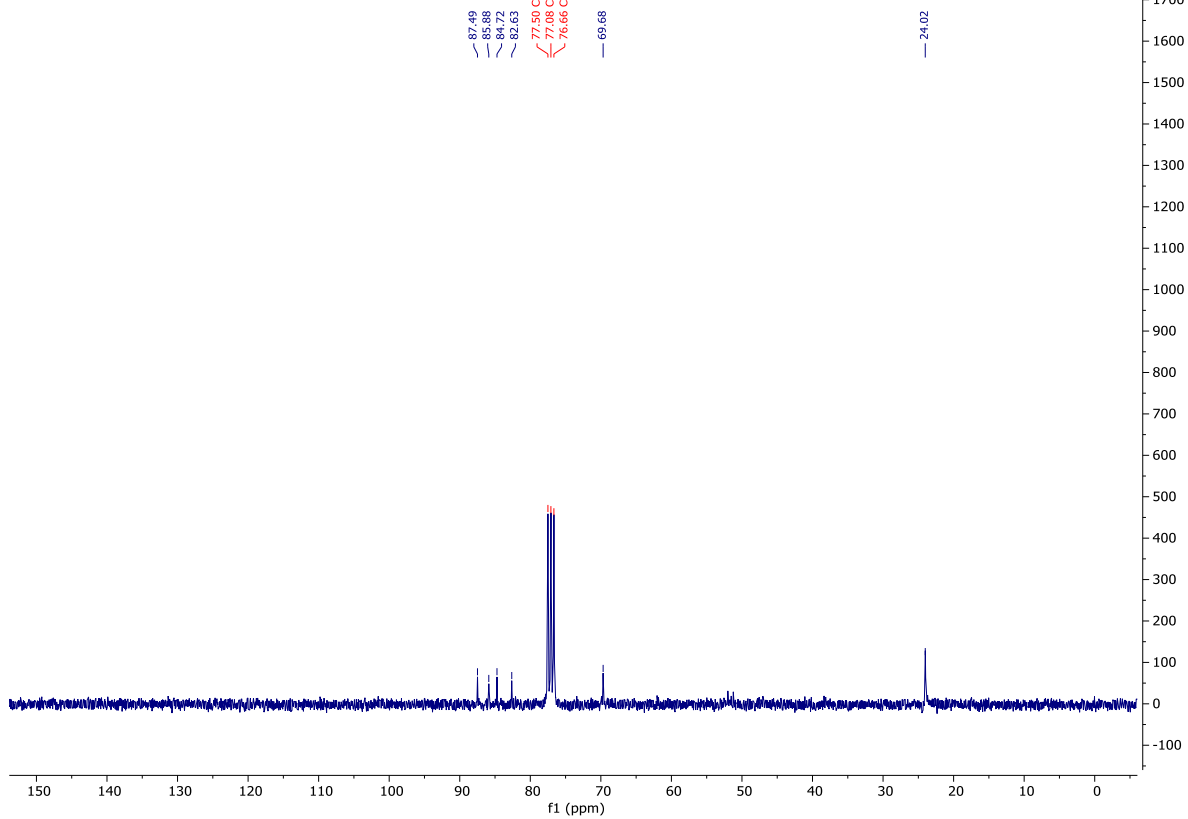

$^{31}\text{P}$ -C<sub>5</sub>H<sub>4</sub>C(O)OCH<sub>3</sub>CoI<sub>2</sub>(P(Oi-Pr)<sub>3</sub>)

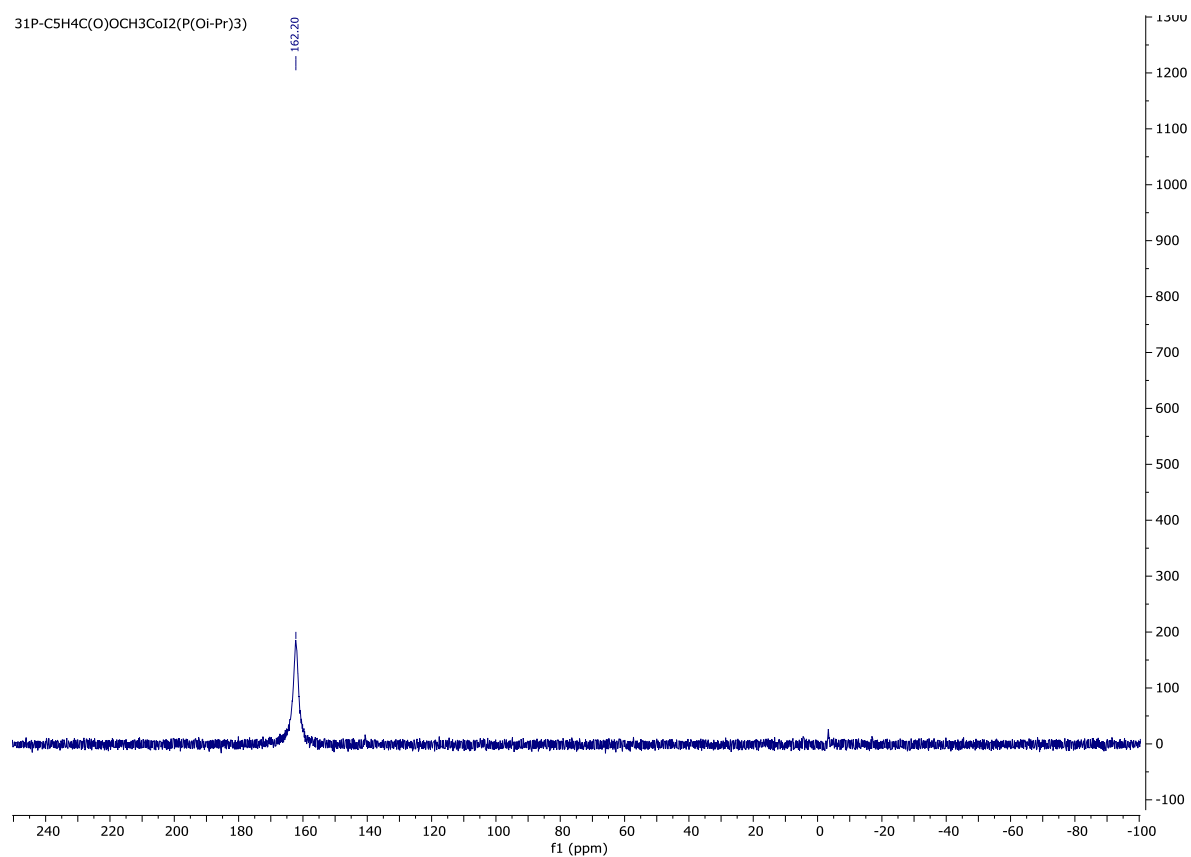

## Complex 21:

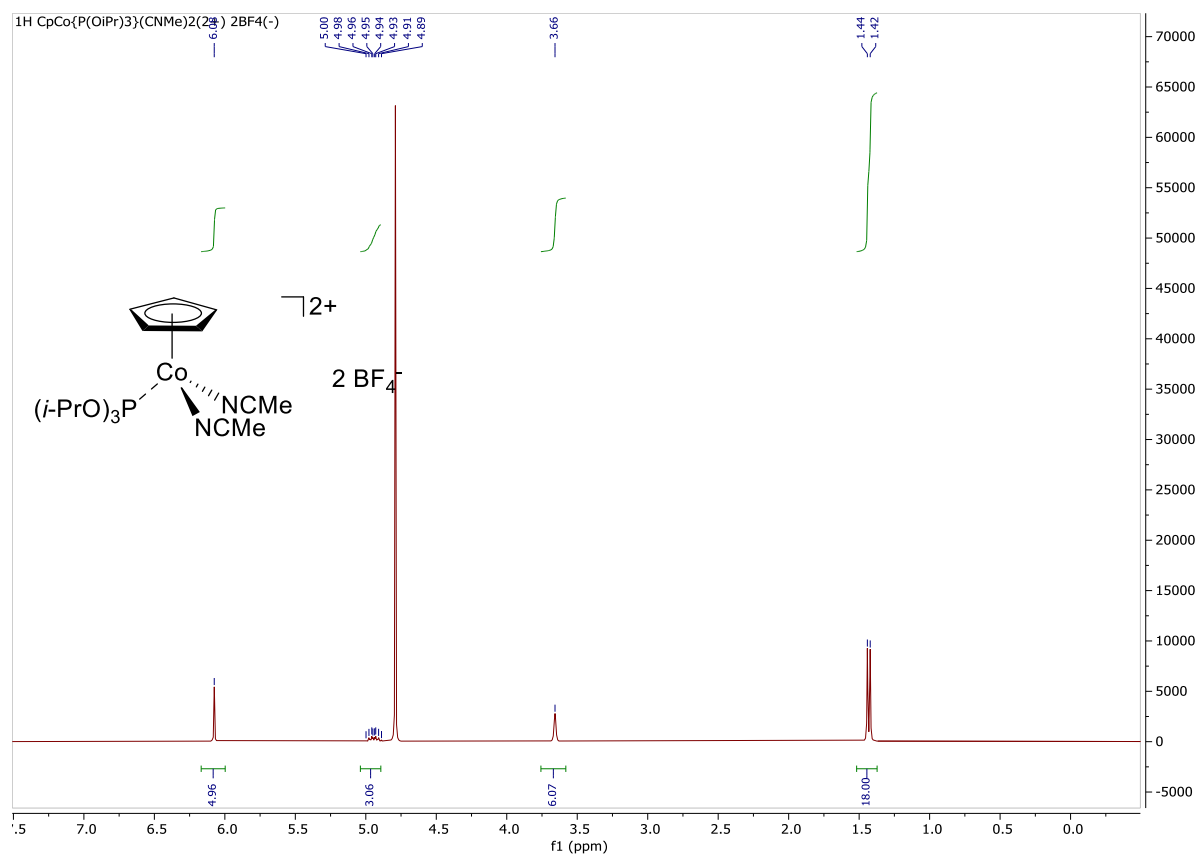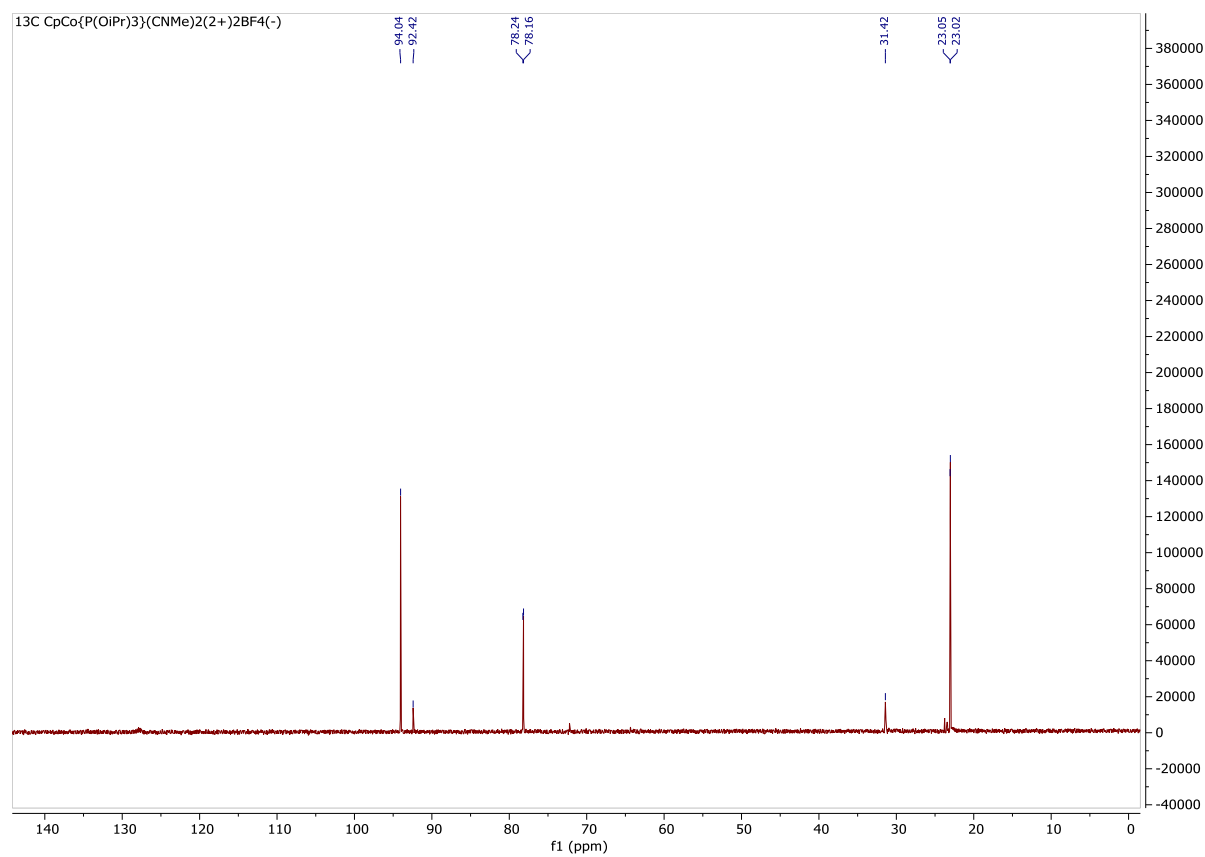

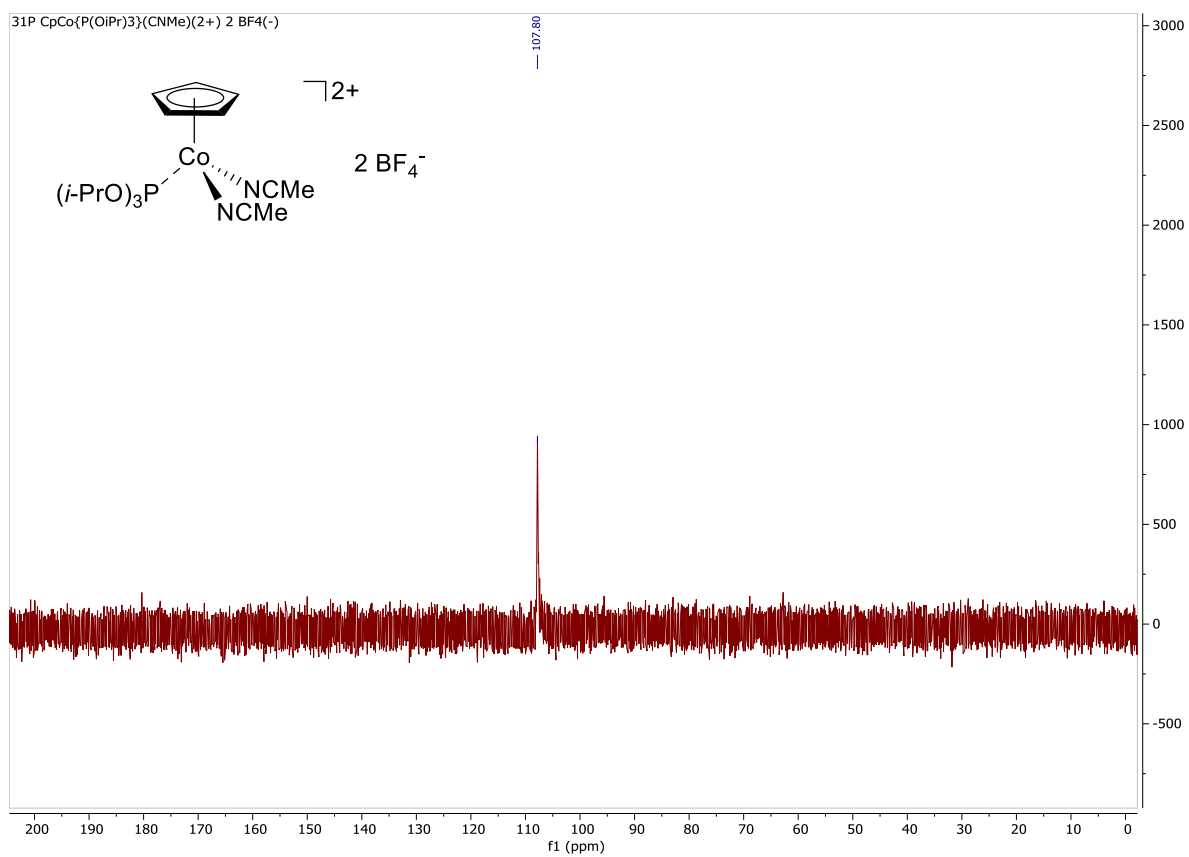

## Reaction control for reaction of complex 2 and triyne 16 (Scheme 8):

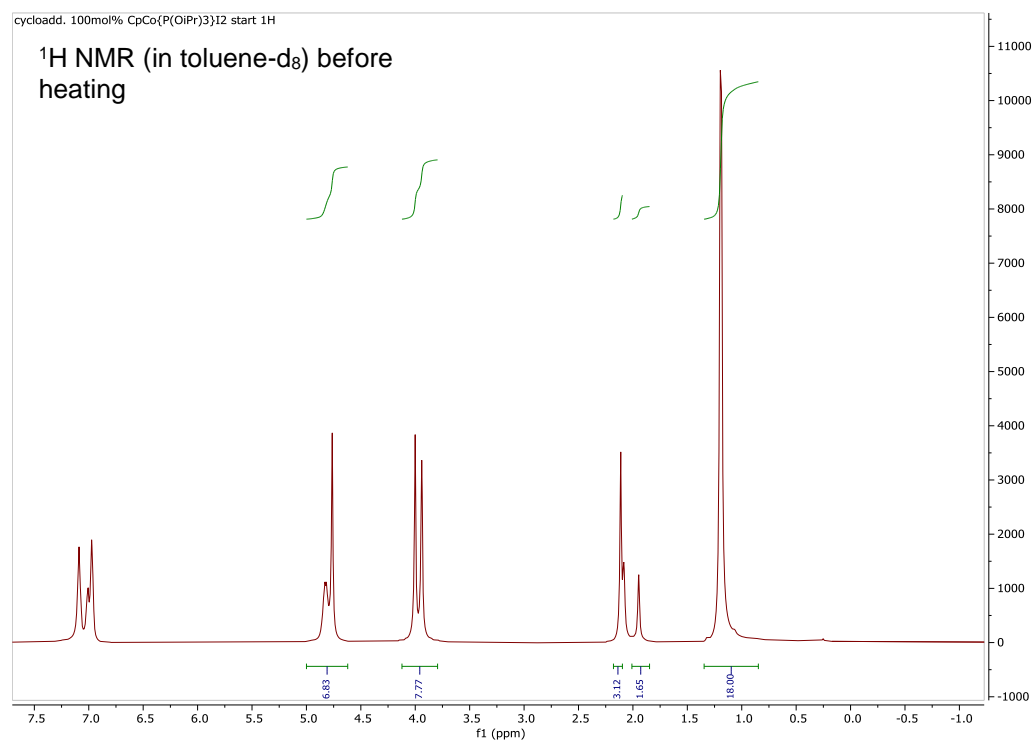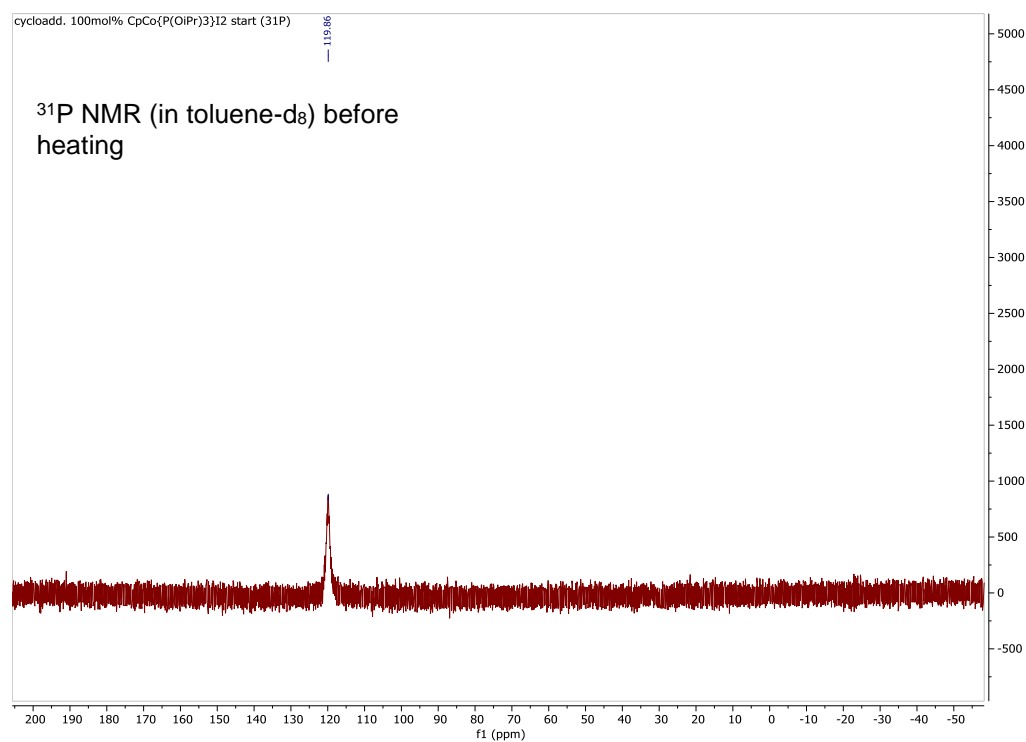



## End (wide range)

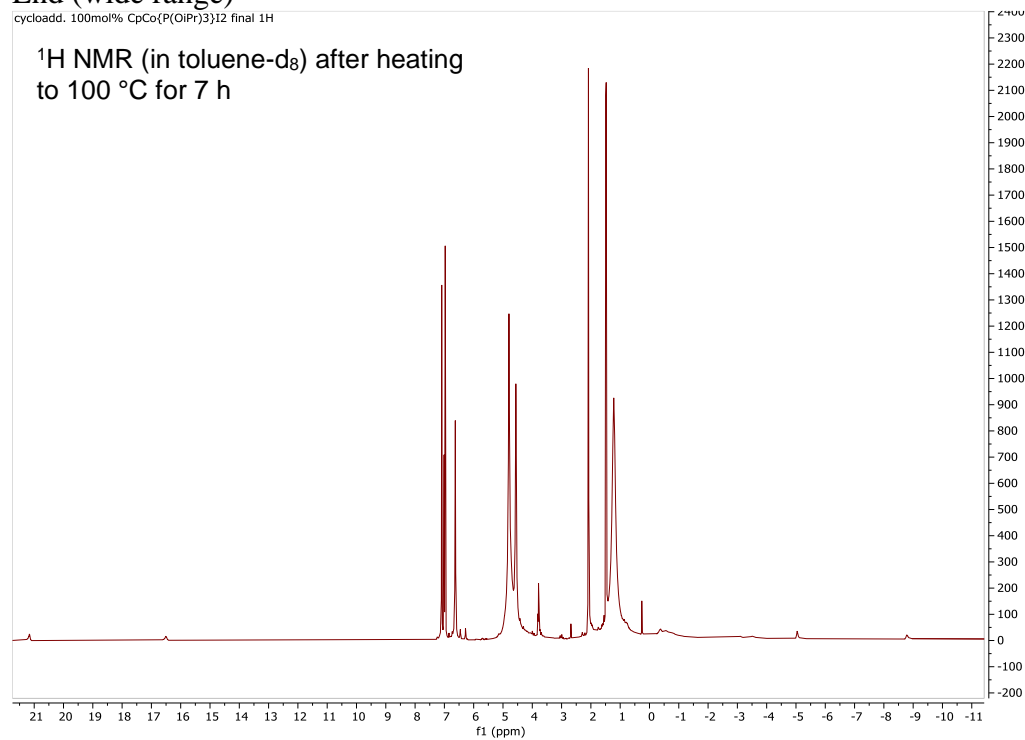

## End (narrow range)

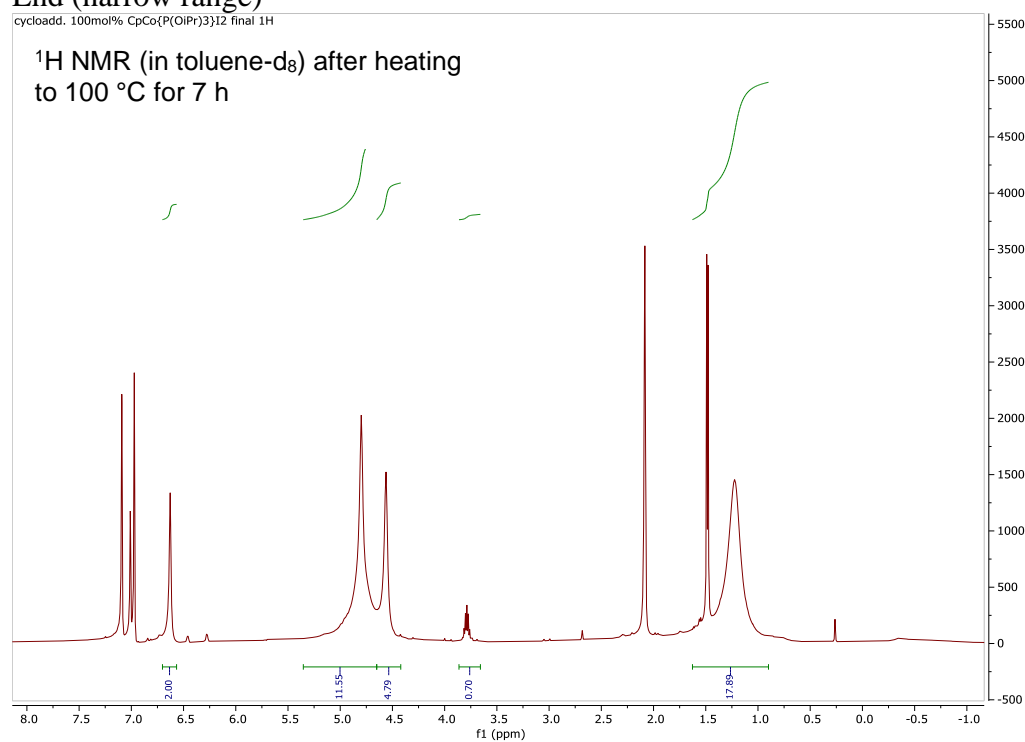

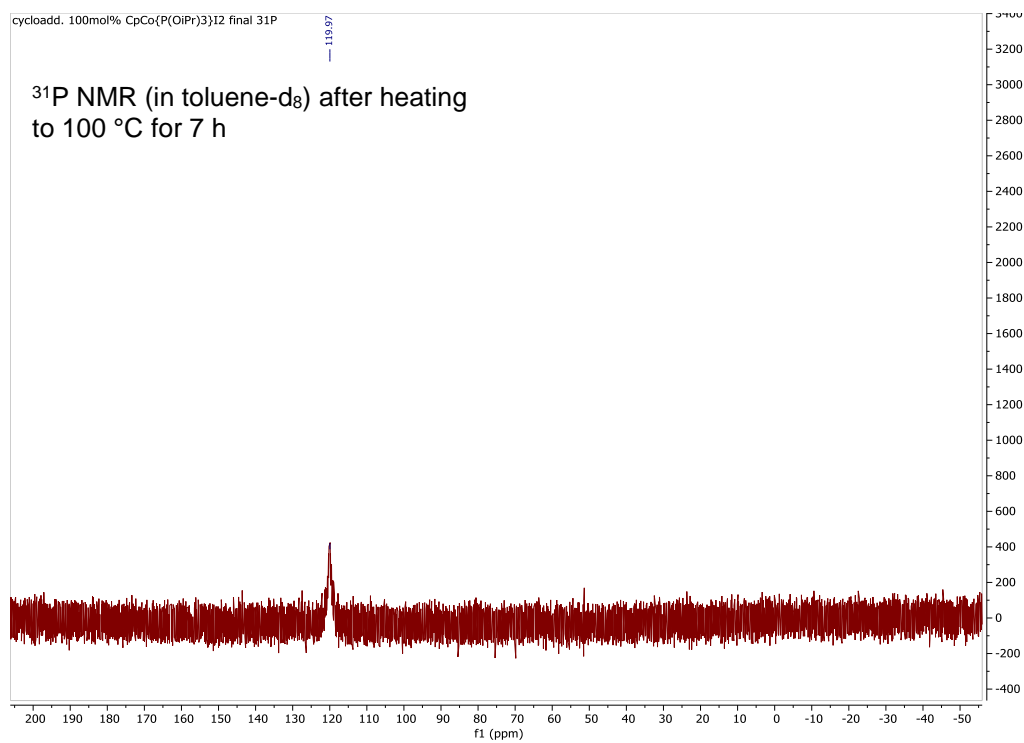

## Spectra overlay

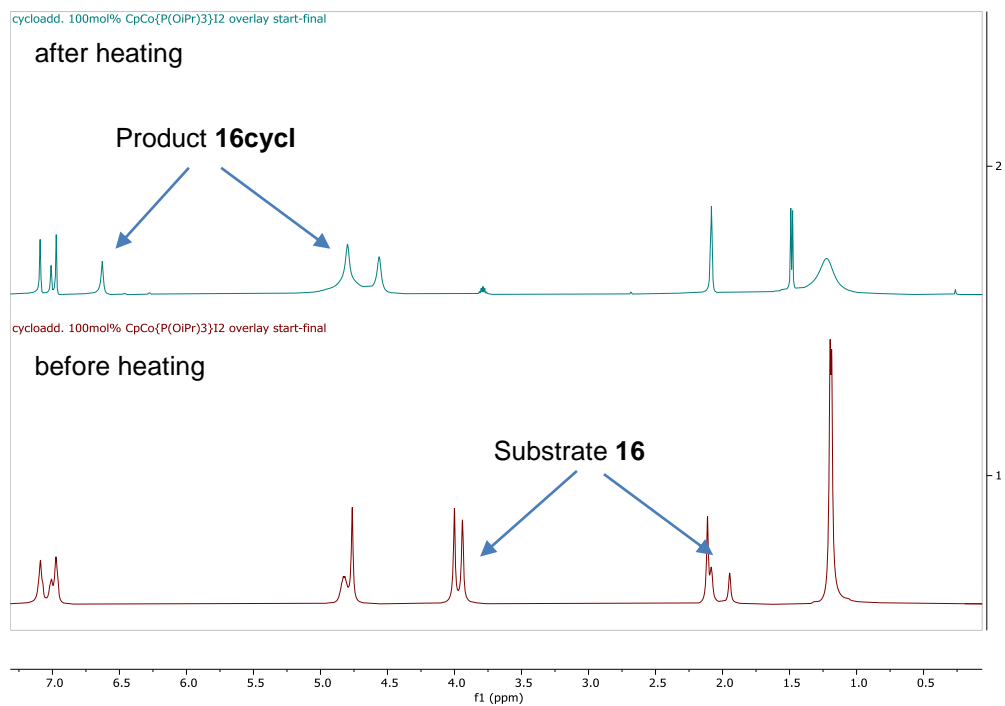

### Cyclization product 16cycl (in CDCl<sub>3</sub>):

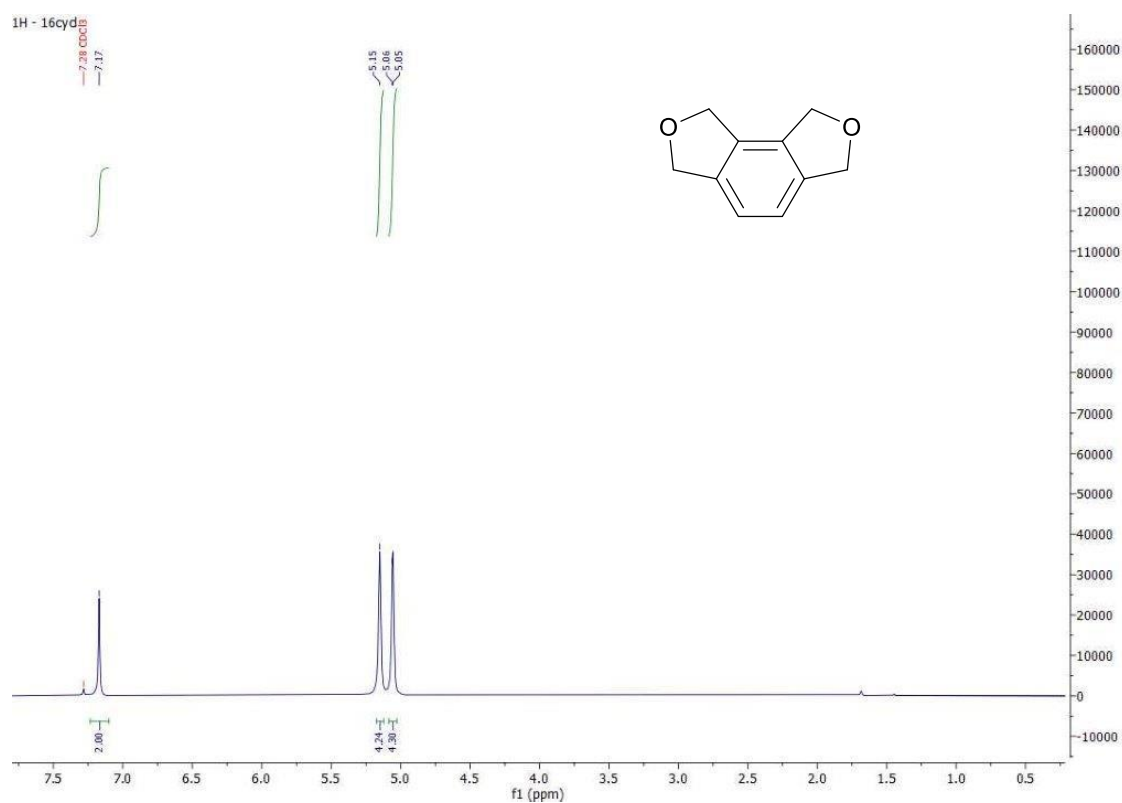

### Cyclization product 17cycl (in CDCl<sub>3</sub>):

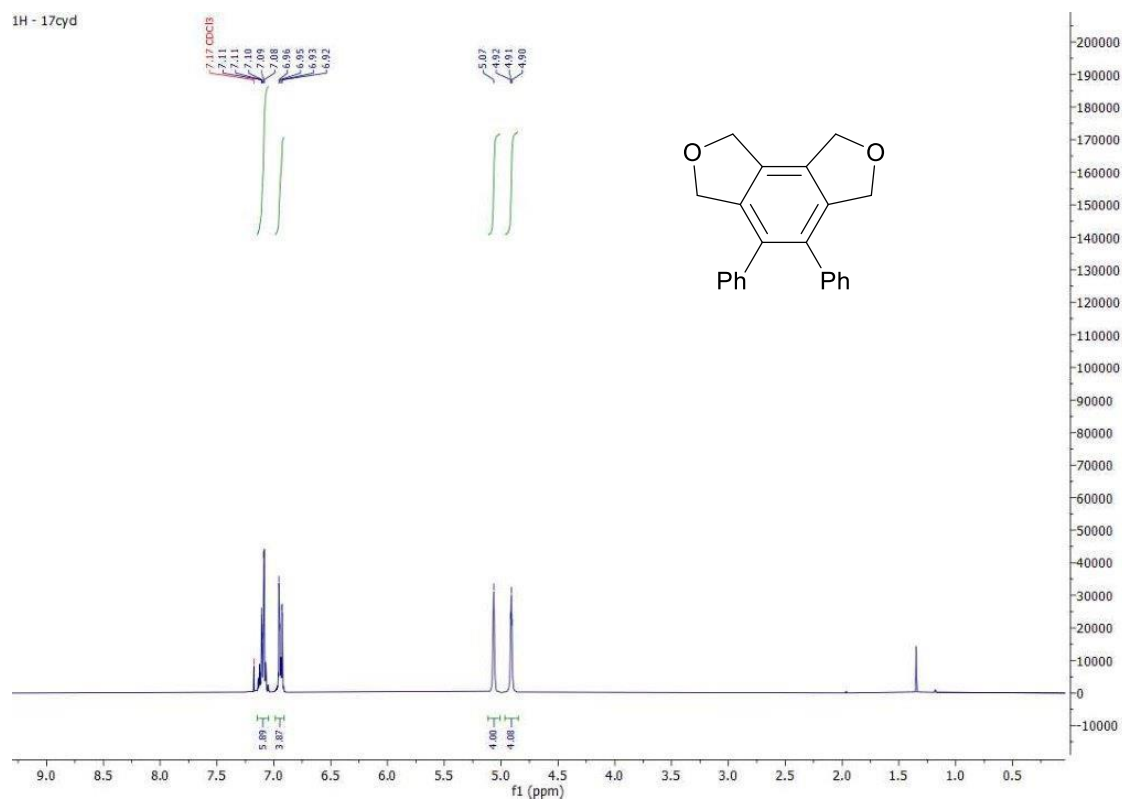

## References

- [1] Fischer, F.; Pientka, T.; Jiao, H.; Spannenberg, A.; Hapke, M. *Catal. Sci. Tech.* **2020**, *10*, 8005-8014.
